# Supplementary material for: Association between neighbourhood walkability and metabolic risk factors influenced by physical activity: a cross-sectional study of adults in Toronto, Canada
Source: PubMed Central journal article supplement — BMJ Open. 2017 Apr 8;7(4):e013889. doi: 10.1136/bmjopen-2016-013889 (PMC5775455; doi:10.1136/bmjopen-2016-013889), 2017-04-08
Supplement: bmjopen-2016-013889.draft_revisions.pdf [file bmjopen-2016-013889.draft_revisions.pdf]

# BMJ Open

## Association between neighbourhood walkability and metabolic risk factors influenced by physical activity: a cross-sectional study of adults in Toronto, Canada

|                                 |                                                                                                                                                                                                                                                                                                                                                                                                                             |
|---------------------------------|-----------------------------------------------------------------------------------------------------------------------------------------------------------------------------------------------------------------------------------------------------------------------------------------------------------------------------------------------------------------------------------------------------------------------------|
| Journal:                        | <i>BMJ Open</i>                                                                                                                                                                                                                                                                                                                                                                                                             |
| Manuscript ID                   | bmjopen-2016-013889                                                                                                                                                                                                                                                                                                                                                                                                         |
| Article Type:                   | Research                                                                                                                                                                                                                                                                                                                                                                                                                    |
| Date Submitted by the Author:   | 16-Aug-2016                                                                                                                                                                                                                                                                                                                                                                                                                 |
| Complete List of Authors:       | Loo, C K Jennifer; University of Toronto Dalla Lana School of Public Health, Public Health and Preventive Medicine<br>Greiver, Michelle; University of Toronto, Department of Family and Community Medicine<br>Aliarzadeh, Babak; University of Toronto, Department of Family and Community Medicine<br>Lewis, Daniel; London School of Hygiene and Tropical Medicine, Department of Social & Environmental Health Research |
| <b>Primary Subject Heading</b>: | Public health                                                                                                                                                                                                                                                                                                                                                                                                               |
| Secondary Subject Heading:      | Public health, Diabetes and endocrinology                                                                                                                                                                                                                                                                                                                                                                                   |
| Keywords:                       | PUBLIC HEALTH, built environment, walkability                                                                                                                                                                                                                                                                                                                                                                               |
|                                 |                                                                                                                                                                                                                                                                                                                                                                                                                             |

SCHOLARONE™  
Manuscripts

Only

1  
2  
3 **ASSOCIATION BETWEEN NEIGHBOURHOOD WALKABILITY AND METABOLIC RISK**  
4 **FACTORS INFLUENCED BY PHYSICAL ACTIVITY: A CROSS-SECTIONAL STUDY OF**  
5 **ADULTS IN TORONTO, CANADA**  
6

7 CK Jennifer Loo<sup>1</sup>, Michelle Greiver<sup>2,4</sup>, Babak Aliarzadeh<sup>2,4</sup>, Daniel Lewis<sup>3</sup>  
8

9  
10 <sup>1</sup>Dalla Lana School of Public Health, University of Toronto, 155 College Street, Toronto, Ontario, Canada,  
11 M5T 3M7

12 <sup>2</sup>Department of Family and Community Medicine, University of Toronto, 500 University Avenue, 5th Floor,  
13 Toronto, Ontario, M5G 1V7  
14 Canada

15 <sup>3</sup> Department of Social and Environmental Health Research, Faculty of Public Health and Policy, London  
16 School of Hygiene and Tropical Medicine, UK.

17 <sup>4</sup>North York General Hospital, 4001 Leslie Street, Toronto, ON M2K 1E1, Canada  
18  
19

20 **Manuscript Authors**  
21

22 CK Jennifer Loo

23 Resident Physician, Dalla Lana School of Public Health, University of Toronto, Toronto, Ontario,  
24 Canada  
25

26 Michelle Greiver

27 Associate Professor, Department of Family and Community Medicine, University of Toronto,  
28 Toronto, Ontario, Canada  
29

30 Babak Aliarzadeh

31 Data Analytics Manager, Department of Family and Community Medicine, University of Toronto,  
32 Toronto, Ontario, Canada  
33  
34

35 Daniel Lewis

36 Research Fellow, Department of Social & Environmental Health Research, London School of  
37 Hygiene and Tropical Medicine, London, UK.  
38  
39

40 **Correspondence to:**

41 CK Jennifer Loo

42 Public Health & Preventive Medicine

43 Dalla Lana School of Public Health, University of Toronto

44 155 College Street, Toronto ON Canada, M5T 3M7

45 (+1)-416-357-1212

46 [jennifer.loo@mail.utoronto.ca](mailto:jennifer.loo@mail.utoronto.ca)  
47  
48  
49  
50

51 **Key Words:** neighbourhood walkability, built environment, obesity  
52  
53

54 **Word Count:** 3700 words  
55  
56  
57  
58  
59  
60

1  
2  
3  
4  
5  
6  
7  
8  
9  
10  
11  
12  
13  
14  
15  
16  
17  
18  
19  
20  
21  
22  
23  
24  
25  
26  
27  
28  
29  
30  
31  
32  
33  
34  
35  
36  
37  
38  
39  
40  
41  
42  
43  
44  
45  
46  
47  
48  
49  
50  
51  
52  
53  
54  
55  
56  
57  
58  
59  
60

## TITLE

**Association between neighbourhood walkability and metabolic risk factors influenced by physical activity: a cross-sectional study of adults in Toronto, Canada**

## ABSTRACT

**Objective:** To determine whether neighbourhood walkability is associated with clinical measures of obesity, hypertension, diabetes, and dyslipidemia in an urban adult population.

**Design:** Observational cross-sectional study

**Setting:** Urban primary care patients

**Participants:** 78,023 Toronto residents, aged 18 years and over, who received care from a primary care physician participating in the University of Toronto Practice Based Research Network (UTOPIAN), within the Canadian Primary Care Sentinel Surveillance Network (CPCSSN). Included participants must have been formally rostered, or have had at least two visits, with a CPCSSN-UTOPIAN primary care physician between 2012 and 2014.

**Main outcome measures:** Differences in average BMI, systolic and diastolic blood pressure, fasting blood glucose, hemoglobin A1c, total cholesterol, high-density lipoprotein, low-density lipoprotein, and triglyceride between residents in the highest quartile of neighbourhood walkability and residents in lowest quartile of walkability. Outcomes were objectively measured by primary care practitioners or through laboratory testing and were retrieved from primary care electronic medical records.

**Results:** Compared to those in the lowest neighbourhood walkability quartile, individuals in the highest quartile had lower mean BMI (-2.64 kg/m<sup>2</sup>, 95% CI -2.98 to -2.30; p<0.001), systolic blood pressure (-1.35 mmHg, 95% CI -2.01 to -0.70; p<0.001), diastolic blood pressure (-0.60 mmHg, 95% CI -1.06 to -0.14; p=0.010), and hemoglobin A1c (-0.063%, 95% CI -0.11 to -0.021; p=0.003), and higher mean high-density lipoprotein (0.052 mmol/L, 95% CI 0.029 to 0.075; p<0.001).

**Conclusions:** There was a clinically meaningful association between living in a neighbourhood in the highest walkability quartile and having lower BMI and modestly lower blood pressure.

**STRENGTHS AND LIMITATIONS OF THIS STUDY**

- This neighbourhood walkability study is unique in examining a set of objectively measured metabolic risk factors, all of which are known to change with physical activity.
- We used electronic medical record data, which allowed us to control for patient-level covariates and express results in a clinically meaningful way.
- It was not possible to control for diet or the food environment with our study data.
- The cross-sectional study design could not rule out a residential selection effect in which individuals with healthier lifestyles may choose to reside in more walkable neighbourhoods.

For peer review only

## INTRODUCTION

Increasing physical activity can significantly impact disability adjusted life years (DALYs) in developed countries. This is because many of the top risk factors associated with excess morbidity and mortality – high body mass index, high blood pressure, high glycemic levels, and high cholesterol – are all impacted by exercise [1]. Clinical practice guidelines consistently recommend physical activity, both as part of a healthy lifestyle [2-4] and as non-pharmacologic therapy for overweight and obesity [5-8], hypertension [9-11], diabetes [12-14], and dyslipidemia [15-17]. At the population level, public health professionals have advocated for the use of built environment designs that support or promote active transportation such as walking or cycling [18 19]. This latter approach advances health promotion to sectors beyond health care, toward the creation of public policies and environments that support health [20].

Multiple scales have been developed and validated to measure aspects of a neighbourhood's built environment that promote pedestrian walking [21 22]. Characteristics such as residential density, intersection density, and public transport density have been shown to influence walkability and physical activity [23]. Current evidence suggests that greater neighbourhood walkability is associated with increased physical activity, through walking for transport or "utilitarian walking" [24-29]. Studies using survey or administrative data have found associations between areas of higher walkability and population-level health outcomes such as lower prevalence of obesity, diabetes [28 30 31], [30 32] and hypertension [33]. However, there is limited information on objectively measured metabolic risk factors which are known to change with physical activity.

This study examined the association between relative residential neighbourhood walkability and objectively measured metabolic risk factors in an urban adult population.

## METHODS

This was an observational cross-sectional study which used routinely collected electronic medical record (EMR) data linked with neighborhood-level characteristics.

### Study Population

The study population included patients, aged 18 and above, seen by a primary care physician participating in the University of Toronto Practice Based Research Network (UTOPIAN). UTOPIAN is one of 11 Primary Care Practice Based Research Networks that are part of the Canadian Primary Care Sentinel Surveillance Network (CPCSSN). CPCSSN is a multi-disease surveillance system where primary care physicians contribute de-identified EMR data to a national database [34]. Patients who were enrolled with, or who had at least two visits with a CPCSSN-UTOPIAN primary care physician between January 1, 2012 and December 31, 2014 and who had a valid City of Toronto residential postal code were included in this study. Data were extracted as of December 31, 2014 using procedures previously described [34].

### Measure of Neighbourhood Walkability

The walkability of each individual's residential neighbourhood was measured using Walk Score<sup>®</sup>, a validated index that calculates the walkability of an address based on distance to amenities and aspects of pedestrian friendliness including population density, block length, and intersection density [35]. In this walkability index, locations are scored from 0 to 100, where 100 is the most walkable [35]. Toronto has 140 neighbourhoods, each of which is an administrative

1  
2  
3 area that covers several city blocks, and has a minimum population of 7,000 to 10,000 [36].  
4 Neighbourhood-level Walk Scores<sup>®</sup> for all Toronto neighbourhoods are publicly available online  
5 [37] and represent a population-weighted aggregation of a grid of Walk Score<sup>®</sup> points for the  
6 entire area of a neighbourhood, as delineated by administrative boundaries [35]. Based on their  
7 residential postal code, participants were assigned to a Toronto neighbourhood using Toronto  
8 neighbourhood and postal code area shapefiles [38-40] with ESRI ArcGIS ArcMap V.10.1.  
9

## 10 11 **Health Outcome Measures**

12  
13 The health outcome measures in this study were body mass index (BMI), systolic and  
14 diastolic blood pressure (sBP, dBP), fasting blood glucose (FBG), hemoglobin A1c (HbA1c),  
15 total cholesterol (TC), high-density lipoprotein (HDL), low-density lipoprotein (LDL), and  
16 triglyceride (TG). If multiple values were present for the period, the most recent record was  
17 used for data analysis. Given that the study sample was derived from a primary care patient  
18 population, the collection of these health measures represented the full spectrum of clinical  
19 testing: screening of healthy and at-risk individuals, diagnosis of individuals, and monitoring of  
20 individuals with chronic conditions for disease control and therapy optimization.  
21

## 22 23 **Covariates**

24  
25 Individual and neighbourhood level covariates were measured. Individual health and  
26 socio-demographic characteristics obtained from CPCSSN-UTOPIAN data included patient age,  
27 sex, current smoking status, presence of a diagnosis of hypertension or diabetes, and presence  
28 of a prescription for a weight-loss medication, an anti-hypertensive medication, an anti-diabetic  
29 medication, or a lipid-lowering medication. Diagnoses of hypertension and diabetes were based  
30 upon validated CPCSSN case definitions and case-finding algorithms [41].  
31

32  
33 Neighbourhood rates of violent crime reported to the Toronto Police Service (i.e. assault,  
34 sexual assault, robbery, and murder) were used as an indicator of neighbourhood safety [42].  
35 Scores reflecting material deprivation, ethnic concentration, residential instability, and  
36 dependency at the Toronto neighbourhood level were also retrieved from the Ontario  
37 Marginalization Index [43 44]. Material deprivation scores incorporated measures of  
38 unemployment, low income, low education, and low-quality housing. Ethnic concentration  
39 scores accounted for recent immigration and self-identification as a visible minority. Residential  
40 instability scores were derived from multiple indicators, including the proportion of the population  
41 who had moved in the previous five years, and the proportion of dwellings that were not owned.  
42 Dependency scores included indicators measuring the proportion of the population aged 65 and  
43 older and the proportion of the population not participating in the labour force [43 44].  
44

## 45 46 **Statistical Analysis**

47  
48 Descriptive statistics were calculated for demographic variables, health outcome  
49 measures and all covariates. Toronto neighbourhood walkability was visualized with a  
50 choropleth map. Means and 95% confidence intervals (95% CI) of all health measures were  
51 calculated for the highest and lowest neighbourhood walkability quartiles. Multivariable linear  
52 regression models were also used to compare mean health measures in the highest versus the  
53 lowest walkability quartile. All models were adjusted for covariates of age, sex, smoking status,  
54 neighbourhood rates of violent crime and neighbourhood indices of material deprivation, ethnic  
55 concentration, residential instability and dependency. Models predicting BMI were also adjusted  
56 for the presence of a weight-loss medication. Models predicting blood pressure were adjusted  
57 for BMI, the presence of a hypertension diagnosis and prescription of anti-hypertensive  
58  
59

medication. Models predicting HbA1c and FBG were adjusted for BMI, the presence of a diabetes diagnosis and prescription of anti-diabetic medication. Models predicting cholesterol (total cholesterol, HDL, LDL, TG) were adjusted for BMI and the presence of a prescription for lipid-lowering medication. There were insufficient observations within each neighbourhood to use multilevel models. However, to ensure that the use of non-hierarchical linear regression was appropriate, intraclass correlation coefficients (ICCs) were calculated. Low ICCs for each health outcome (ICC=0.050 for BMI, ICC<0.01 for all other outcomes) revealed that very little of the total variance was accounted for by clustering within neighbourhoods, and that a non-hierarchical approach was reasonable.

Differences in health measures across walkability quartiles were examined for all ages, and in stratified analyses across three age subgroups of 18 to under 40 years, 40 to 65 years, and over 65 years. Broadly, these age categories represent segments of the population where primary versus secondary prevention strategies may be relevant in distinct ways. A younger adult population is more amenable to primary prevention of chronic disease. Both primary and secondary prevention are relevant for middle-aged adults, and notably, they undergo lipid and diabetes screening as recommended by clinical practice guidelines [15 45]. Finally, older adults may differ from younger adults due to increased medical comorbidities that affect the health markers of interest, and due to potentially decreased mobility that may affect levels of walking and physical activity.

All data were analyzed using Stata IC/ V.12.1 and mapping was carried out using ESRI ArcGIS ArcMap V.10.1. This study was reviewed and approved by the CPCSSN Research Privacy and Ethics Officer and by the London School of Hygiene and Tropical Medicine MSc Research Ethics Committee.

## RESULTS

78, 023 UTOPIAN patients met the inclusion criteria. The generation of the study sample is displayed in Figure 1.

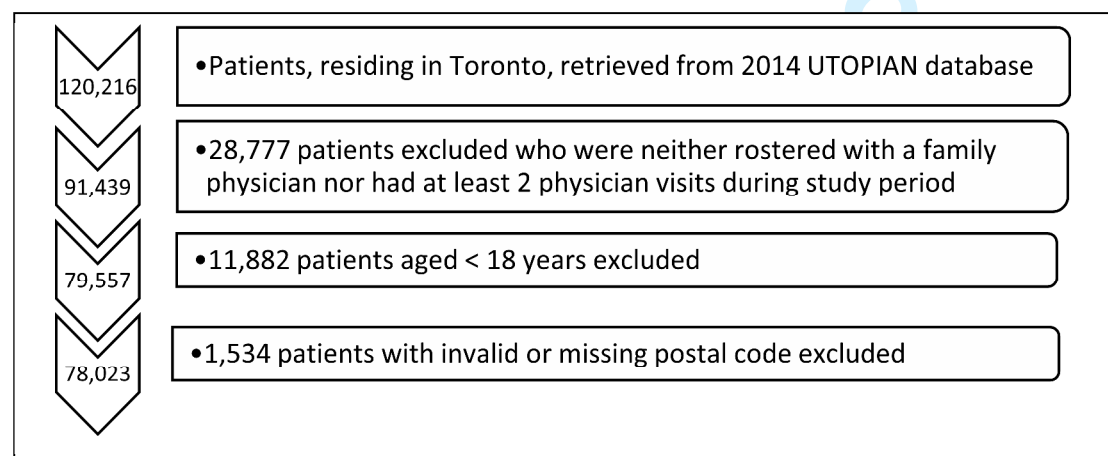

**Figure 1.** Sequence of steps in generation of study sample.

1  
2  
3  
4 Characteristics of the study sample are displayed in Table 1. Residents of the lowest  
5 and highest quartiles of neighbourhood walkability were similar with respect to age, proportion  
6 of women and proportion of smokers. Neighbourhoods in the highest walkability quartile had  
7 higher violent crime rates, somewhat lower deprivation scores, but similar ethnic concentration  
8 compared to neighbourhoods in the lowest quartile. A map of Toronto's 140 neighbourhoods  
9 and their Walk Scores® is displayed in Figure 2. The most walkable neighbourhoods were  
10 concentrated in Toronto's downtown core. Neighbourhood Walk Scores® ranged from 42 to  
11 100.  
12

13  
14 Unadjusted means and 95% CIs for all health measures in the lowest and highest  
15 quartiles of neighbourhood walkability are displayed in Table 2. In the lowest quartile of  
16 neighbourhood walkability, the unadjusted mean BMI, sBP, dBP, FBG, HbA1c, and TG of  
17 residents were all higher than in residents of the highest quartile. On the other hand, the  
18 unadjusted means for TC, HDL and LDL were lower in residents of the lowest walkability  
19 quartile, compared to residents in the highest quartile. All differences in unadjusted means  
20 were significant at the  $p < 0.001$  level.  
21  
22  
23  
24  
25  
26  
27  
28  
29  
30  
31  
32  
33  
34  
35  
36  
37  
38  
39  
40  
41  
42  
43  
44  
45  
46  
47  
48  
49  
50  
51  
52  
53  
54  
55  
56  
57  
58  
59  
60



Table 1. Descriptive characteristics of study participants.

| Characteristic                                                         | Lowest Quartile of Neighbourhood Walkability |           |                      | Highest Quartile of Neighbourhood Walkability |           |                      | Total Study Population |           |                      |
|------------------------------------------------------------------------|----------------------------------------------|-----------|----------------------|-----------------------------------------------|-----------|----------------------|------------------------|-----------|----------------------|
|                                                                        | Frequency (%)                                | Mean (SD) | N patients with data | Frequency (%)                                 | Mean (SD) | N patients with data | Frequency (%)          | Mean (SD) | N patients with data |
| <b>Sex (female)</b>                                                    | 11,303 (62.3%)                               |           |                      | 11,399 (62.7%)                                |           |                      | 48,556 (62.2%)         |           |                      |
| <b>Age [years]</b>                                                     | 49.2 (19.2)                                  |           |                      | 48.5 (17.9)                                   |           |                      | 50.0 (19.2)            |           |                      |
| 18≤age<40                                                              | 6,448 (35.6%)                                |           |                      | 6,895 (37.9%)                                 |           |                      | 26,977 (34.6%)         |           |                      |
| 40≤age≤65                                                              | 7,731 (42.7%)                                |           |                      | 7,760 (42.7%)                                 |           |                      | 33,056 (42.4%)         |           |                      |
| >65 years                                                              | 3,943 (21.8%)                                |           |                      | 3,525 (19.4%)                                 |           |                      | 17,933 (23.0%)         |           |                      |
| <b>Smoking (current smoker)</b>                                        | 1,530 (12.0%)                                |           |                      | 1,669 (13.3%)                                 |           |                      | 6,808 (12.1%)          |           |                      |
| <b>Anthropometric indicators</b>                                       |                                              |           |                      |                                               |           |                      |                        |           |                      |
| Body Mass Index (BMI) [kg/m <sup>2</sup> ]                             | 29.6 (10.0)                                  |           |                      | 26.0 (6.22)                                   |           |                      | 27.2 (7.4)             |           |                      |
| Overweight or obese (BMI≥25 kg/m <sup>2</sup> )                        | 6,370 (64.9%)                                |           |                      | 5,505 (50.4%)                                 |           |                      | 26,309 (57.2%)         |           |                      |
| Prescribed weight-loss medication                                      | 1,146 (6.3%)                                 |           |                      | 523 (2.9%)                                    |           |                      | 3,387 (4.3%)           |           |                      |
| <b>Blood pressure control</b>                                          |                                              |           |                      |                                               |           |                      |                        |           |                      |
| Hypertension diagnosis                                                 | 4,068 (22.4%)                                |           |                      | 2,980 (16.4%)                                 |           |                      | 16,241 (20.8%)         |           |                      |
| Prescribed anti-hypertensive medication                                | 4,796 (26.4%)                                |           |                      | 3,555 (19.5%)                                 |           |                      | 19,020 (24.4%)         |           |                      |
| Systolic blood pressure (sBP) [mmHg]                                   | 121.5 (16.0)                                 |           |                      | 117.4 (15.5)                                  |           |                      | 119.8 (16.0)           |           |                      |
| Diastolic blood pressure (dBP) [mmHg]                                  | 75.0 (10.0)                                  |           |                      | 73.1 (10.0)                                   |           |                      | 73.8 (10.0)            |           |                      |
| <b>Blood glucose control</b>                                           |                                              |           |                      |                                               |           |                      |                        |           |                      |
| Diabetes diagnosis                                                     | 2,242 (12.4%)                                |           |                      | 1,096 (6.0%)                                  |           |                      | 6,988 (9.0%)           |           |                      |
| Prescribed anti-diabetic medication                                    | 1,788 (9.9%)                                 |           |                      | 786 (4.3%)                                    |           |                      | 5,220 (6.7%)           |           |                      |
| Hemoglobin A1c (HbA1c) [%]                                             | 6.10 (1.10)                                  |           |                      | 5.74 (0.75)                                   |           |                      | 5.89 (0.88)            |           |                      |
| Fasting blood glucose (FBG) [mmol/L]                                   | 5.56 (1.70)                                  |           |                      | 5.32 (1.26)                                   |           |                      | 5.42 (1.46)            |           |                      |
| <b>Lipid control</b>                                                   |                                              |           |                      |                                               |           |                      |                        |           |                      |
| Prescribed lipid-lowering medication                                   | 3,686 (20.3%)                                |           |                      | 2,453 (13.5%)                                 |           |                      | 13,979 (17.9%)         |           |                      |
| Total cholesterol (TC) [mmol/L]                                        | 4.73 (1.08)                                  |           |                      | 4.93 (1.04)                                   |           |                      | 4.81 (1.06)            |           |                      |
| High density lipoprotein (HDL) [mmol/L]                                | 1.43 (0.41)                                  |           |                      | 1.58 (0.47)                                   |           |                      | 1.49 (0.44)            |           |                      |
| Low density lipoprotein (LDL) [mmol/L]                                 | 2.71 (0.90)                                  |           |                      | 2.78 (0.88)                                   |           |                      | 2.74 (0.89)            |           |                      |
| Triglycerides (TG) [mmol/L]                                            | 1.34 (1.05)                                  |           |                      | 1.26 (0.79)                                   |           |                      | 1.31 (0.87)            |           |                      |
| <b>Neighbourhood violent crime rate* [events per 10,000 residents]</b> | 95.4 (49.8)                                  |           |                      | 128.2 (84.3)                                  |           |                      | 91.3 (59.6)            |           |                      |
| <b>Neighbourhood Instability Score<sup>†</sup></b>                     | -0.048 (0.48)                                |           |                      | 1.37 (0.68)                                   |           |                      | 0.480 (0.71)           |           |                      |
| <b>Neighbourhood Deprivation Score<sup>†</sup></b>                     | 0.30 (0.96)                                  |           |                      | -0.53 (0.69)                                  |           |                      | -0.170 (0.77)          |           |                      |
| <b>Neighbourhood Ethnic Concentration Score<sup>†</sup></b>            | 1.78 (0.89)                                  |           |                      | 0.82 (0.89)                                   |           |                      | 1.353 (1.08)           |           |                      |
| <b>Neighbourhood Dependency Score<sup>†</sup></b>                      | -0.020 (0.36)                                |           |                      | -0.44 (0.27)                                  |           |                      | -0.100 (0.39)          |           |                      |

SD—standard deviation, N—number of observations in study sample

\*Violent crime includes occurrences of assault, sexual assault, robbery, and murder.

†Scores of neighbourhood instability, deprivation, ethnic concentration and dependency are dimensions of the Ontario Marginalization Index [46]. Scores are population-weighted, and higher values indicate greater instability/deprivation/ethnic concentration/dependency.

1  
2  
3  
4  
5  
6  
7  
8  
9  
10  
11  
12  
13  
14  
15  
16  
17  
18  
19  
20  
21  
22  
23  
24  
25  
26  
27  
28  
29  
30  
31  
32  
33  
34  
35  
36  
37  
38  
39  
40  
41  
42  
43  
44  
45  
46  
47  
48  
49

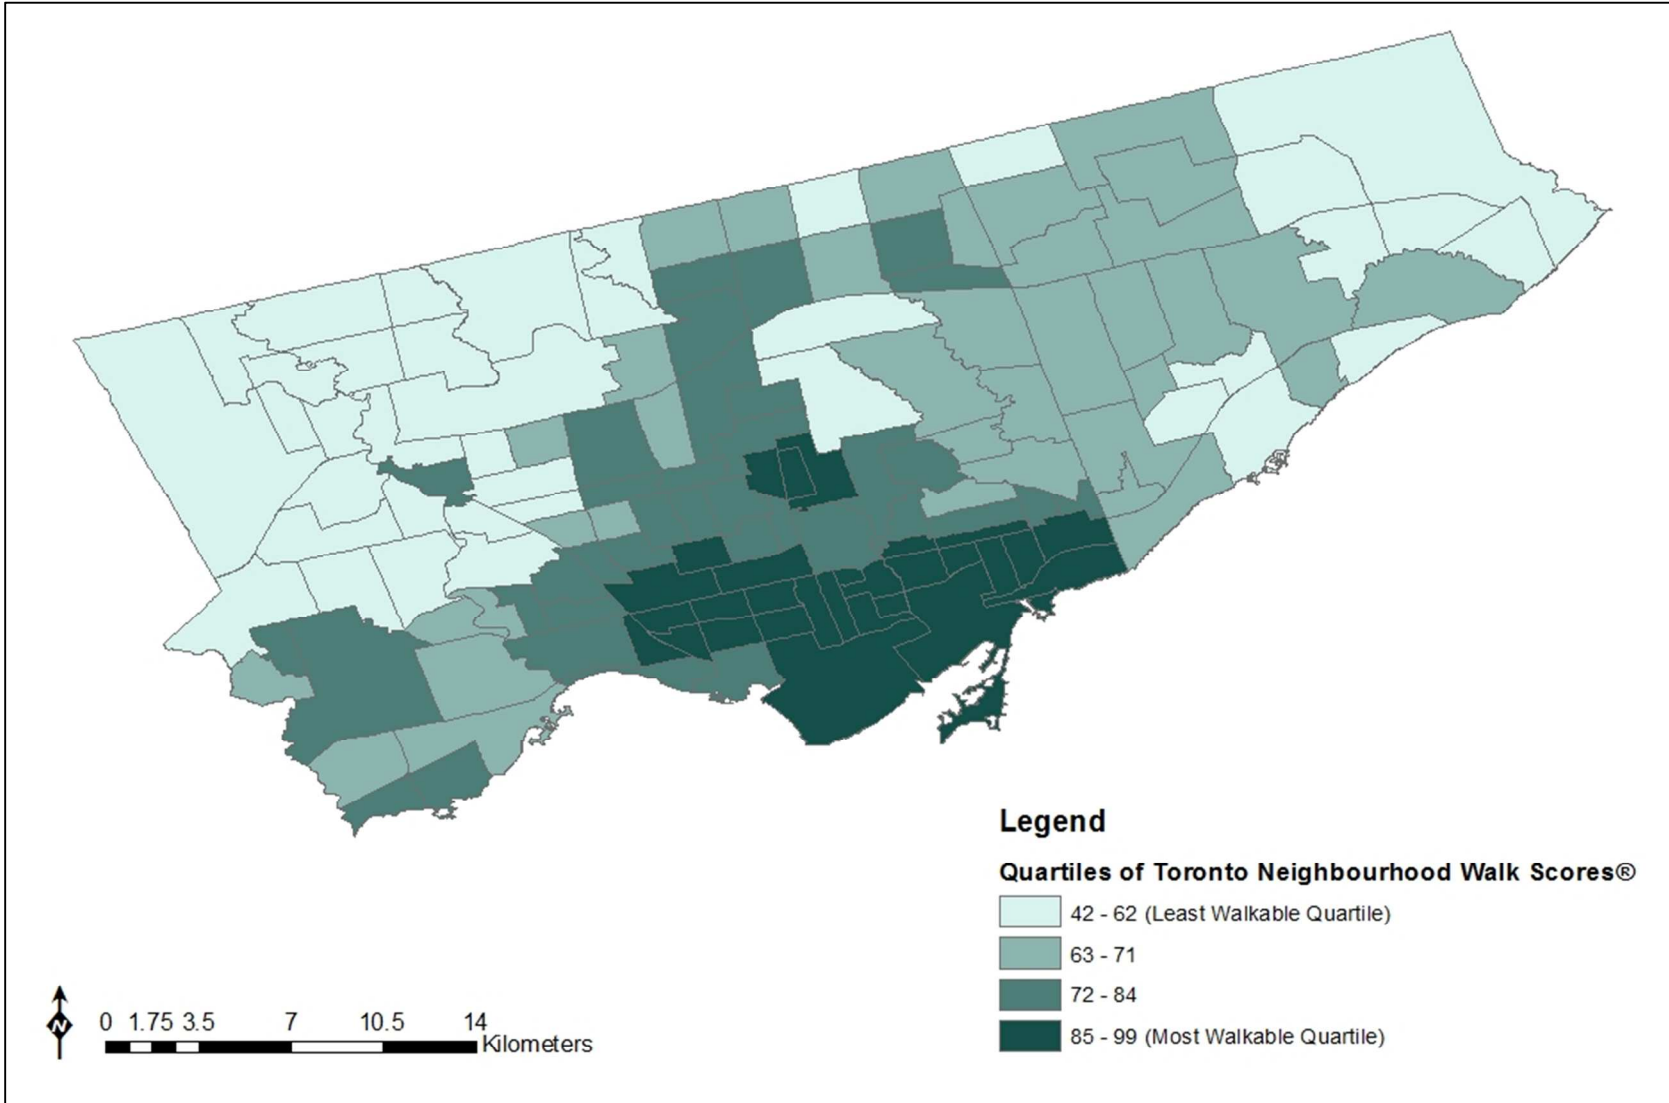

**Figure 2.** Map of Toronto neighbourhood walkability as measured by neighbourhood Walk Scores®. Walk Scores® for Toronto neighbourhoods (n=140) were retrieved from [www.walkscore.com](http://www.walkscore.com) [37].

**Table 2. Unadjusted means and 95% confidence intervals (95% CIs) for health measures in the lowest and highest quartiles of neighbourhood walkability.**

| Health measure [unit]    | Mean (95% CI) in Lowest Quartile of Neighbourhood Walkability | Mean (95% CI) in Highest Quartile of Neighbourhood Walkability |
|--------------------------|---------------------------------------------------------------|----------------------------------------------------------------|
| BMI [kg/m <sup>2</sup> ] | 29.6 (29.5–29.8)                                              | 26.0 (25.9–26.2)*                                              |
| sBP [mmHg]               | 121.5 (121.2–121.7)                                           | 117.4 (117.2–117.7)*                                           |
| dBP [mmHg]               | 75.0 (74.8–75.1)                                              | 73.1 (72.9–73.3)*                                              |
| HbA1c [%]                | 6.10 (6.08–6.12)                                              | 5.74 (5.72–5.76)*                                              |
| FBG [mmol/L]             | 5.56 (5.53–5.59)                                              | 5.32 (5.28–5.35)*                                              |
| TC [mmol/L]              | 4.73 (4.71–4.75)                                              | 4.93 (4.91–4.96)*                                              |
| HDL [mmol/L]             | 1.43 (1.42–1.44)                                              | 1.58 (1.57–1.59)*                                              |
| LDL [mmol/L]             | 2.71 (2.69–2.73)                                              | 2.78 (2.76–2.80)*                                              |
| TG [mmol/L]              | 1.34 (1.32–1.36)                                              | 1.26 (1.24–1.28)*                                              |

\*Asterisks indicate a significant difference between the unadjusted mean at the highest walkability quartile, compared to the unadjusted mean in the lowest walkability quartile, at a significance level of  $p < 0.001$ .

Table 3 displays the adjusted linear regression coefficients comparing differences in mean health measures between the highest and lowest quartiles of neighbourhood walkability. Data for all quartiles are reported in Supplementary Table 1. After adjusting for covariates, there were statistically significant differences in average measures of BMI, sBP, dBP, HbA1c, and HDL between participants in the lowest versus the highest walkability quartile.

Mean BMI was 2.64 kg/m<sup>2</sup> lower (95% CI -2.98 to -2.30,  $p < 0.001$ ) among individuals in the highest neighbourhood walkability quartile, compared to those in the lowest quartile. In the stratified analyses, this difference was greatest in those aged 18 to under 40, where mean BMI was -4.44 kg/m<sup>2</sup> lower (95% CI -5.09 to -3.79,  $p < 0.001$ ), and smallest in those over age 65, where mean BMI was 0.87 kg/m<sup>2</sup> lower (95% CI -1.48 to -0.26,  $p = 0.005$ ), comparing the highest to lowest neighbourhood walkability quartiles.

When comparing average blood pressure measurements of individuals in the highest quartile of neighbourhood walkability to those in the lowest quartile, mean sBP was 1.35 mmHg lower (95% CI -2.01 to -0.70,  $p < 0.001$ ) and mean dBP was 0.60 mmHg lower (95% CI -1.06 to -0.14,  $p = 0.010$ ). When stratifying by age categories, significant differences in mean sBP and dBP were observed only in those aged 40 to 65.

With respect to blood glucose control, mean HbA1c was 0.063% lower (95% CI -0.11 to -0.021,  $p = 0.003$ ) in those within the highest neighbourhood walkability quartile compared to those in the lowest quartile. Across the age subgroups, a significant difference in mean HbA1c was observed only in those aged 18 to under 40. No evidence of differences in mean FBG was observed between the highest and the lowest quartiles of neighbourhood walkability.

In terms of cholesterol parameters, mean HDL was 0.052 mmol/L higher (95% CI 0.029 to 0.075,  $p < 0.001$ ) in those in the highest versus the lowest neighbourhood walkability quartile. Across the age subgroups, a difference in mean HDL was present in the two older age categories, but absent in those aged 18 to under 40. The difference observed in mean TC was of borderline statistical significance (0.061 mmol/L, 95% CI 0.00025 to 0.12;  $p = 0.049$ ), and in the stratified analyses, was only significant in those aged 40 to 65. No strong evidence of differences in other cholesterol parameters was apparent when comparing the highest to the lowest quartiles of neighbourhood walkability.

**Table 3. Adjusted linear regression coefficients comparing differences in mean health measures between the highest and lowest quartiles of neighbourhood walkability.** Results are presented for all ages and for each age sub-category. Regression coefficients represent differences in the mean health measure, adjusting for covariates of age, sex, current smoking status, BMI (except in the model where BMI is the health outcome measure) relevant medications and medical diagnoses, neighbourhood violent crime rates, and neighbourhood indices of material deprivation, ethnic concentration, dependency, and residential instability.

| Health measure [unit]                         | Regression coefficient (95% CI) | p-value |
|-----------------------------------------------|---------------------------------|---------|
| <b>BMI [kg/m<sup>2</sup>] – all ages ≥ 18</b> | -2.64 (-2.98 to -2.30)          | <0.001  |
| 18 ≤ age < 40                                 | -4.44 (-5.09 to -3.79)          | <0.001  |
| 40 ≤ age ≤ 65                                 | -2.74 (-3.24 to -2.23)          | <0.001  |
| age > 65                                      | -0.87 (-1.48 to -0.26)          | 0.005   |
| <b>sBP [mmHg] – all ages ≥ 18</b>             | -1.35 (-2.01 to -0.70)          | <0.001  |
| 18 ≤ age < 40                                 | -0.64 (-1.68 to 0.41)           | 0.23    |
| 40 ≤ age ≤ 65                                 | -1.97 (-2.91 to -1.03)          | <0.001  |
| age > 65                                      | -0.64 (-2.14 to 0.85)           | 0.40    |
| <b>dBp [mmHg] – all ages ≥ 18</b>             | -0.60 (-1.06 to -0.14)          | 0.010   |
| 18 ≤ age < 40                                 | 0.12 (-0.68 to 0.93)            | 0.76    |
| 40 ≤ age ≤ 65                                 | -1.30 (-1.94 to -0.66)          | <0.001  |
| age > 65                                      | -0.19 (-1.13 to 0.75)           | 0.69    |
| <b>HbA1c [%] – all ages ≥ 18</b>              | -0.063 (-0.11 to -0.021)        | 0.003   |
| 18 ≤ age < 40                                 | -0.12 (-0.23 to -0.019)         | 0.021   |
| 40 ≤ age ≤ 65                                 | -0.059 (-0.12 to 0.0026)        | 0.060   |
| age > 65                                      | -0.013 (-0.078 to 0.051)        | 0.69    |
| <b>FBG [mmol/L] – all ages ≥ 18</b>           | 0.030 (-0.038 to 0.099)         | 0.39    |
| 18 ≤ age < 40                                 | -0.086 (-0.24 to 0.073)         | 0.29    |
| 40 ≤ age ≤ 65                                 | 0.028 (-0.068 to 0.12)          | 0.57    |
| age > 65                                      | 0.083 (-0.036 to 0.20)          | 0.17    |
| <b>TC [mmol/L] – all ages ≥ 18</b>            | 0.061 (0.00025 to 0.12)         | 0.049   |
| 18 ≤ age < 40                                 | -0.023 (-0.18 to 0.13)          | 0.77    |
| 40 ≤ age ≤ 65                                 | 0.11 (0.024 to 0.19)            | 0.012   |
| age > 65                                      | -0.023 (-0.13 to 0.078)         | 0.65    |
| <b>HDL [mmol/L] – all ages ≥ 18</b>           | 0.052 (0.029 to 0.075)          | <0.001  |
| 18 ≤ age < 40                                 | 0.022 (0.038 to 0.081)          | 0.47    |
| 40 ≤ age ≤ 65                                 | 0.052 (0.020 to 0.084)          | 0.001   |
| age > 65                                      | 0.060 (0.019 to 0.10)           | 0.004   |
| <b>LDL [mmol/L] – all ages ≥ 18</b>           | 0.010 (-0.041 to 0.062)         | 0.69    |
| 18 ≤ age < 40                                 | -0.0088 (-0.14 to 0.12)         | 0.89    |
| 40 ≤ age ≤ 65                                 | 0.026 (-0.044 to 0.096)         | 0.47    |
| age > 65                                      | -0.036 (-0.12 to 0.049)         | 0.41    |
| <b>triglyceride [mmol/L] – all ages ≥ 18</b>  | -0.0031 (-0.053 to 0.047)       | 0.90    |
| 18 ≤ age < 40                                 | -0.14 (-0.33 to 0.047)          | 0.14    |
| 40 ≤ age ≤ 65                                 | 0.038 (-0.029 to 0.11)          | 0.27    |
| age > 65                                      | -0.041 (-0.11 to 0.033)         | 0.28    |

## DISCUSSION

### Key findings: Neighbourhood Walkability and Metabolic Risk Factors

We observed an association between higher neighborhood walkability and objectively measured metabolic risk factors. This was most pronounced for BMI, especially for younger adults. The differences observed for BMI and blood pressure were clinically significant and relevant for population health.

## Strengths and Limitations

The main strength of this study is that it used EMR data to examine a set of clinical measures known to change with physical activity, all of which were objectively measured through physical examination or laboratory testing. The study controlled for both individual clinical attributes, as well as neighbourhood-level covariates that could have confounded the relationship between neighbourhood walkability and the metabolic risk factors of interest [26 32 47 48].

Overall, the study population included a large and diverse sample of adults of all ages, with and without chronic disease. However, the application of the study findings to other adult populations in a developed, urban setting should also consider that these were primary care patients. In particular, this population did not include children or adolescents, was older and had a greater proportion of women than the general population of Toronto [49].

The main limitation of this study is its cross-sectional nature, which precludes the establishment of temporality in the association between neighbourhood walkability and health outcomes. Importantly, it is not possible to rule out a residential selection effect, in which healthier individuals who choose to engage in more health-promoting behaviours, such as physical activity, may also choose to live in more walkable areas to facilitate their preferred lifestyle. Similarly, individuals with obesity or diabetes may have poorer mobility and decreased exercise capacity, and may elect to reside in areas that facilitate automobile transportation rather than utilitarian walking. Thus, the magnitude of the observed differences in health measures in this study, and the extent to which they may be attributable to neighbourhood walkability must be interpreted with care. The study is also limited in that it did not control for diet, which could not be captured in a valid manner using electronic medical record (EMR) data. It is possible that dietary habits, particularly as linked to the food environment, may differ between neighbourhoods of high versus low walkability but the extent to which this may have affected estimates in this study is unclear. Similarly, this study did not control for major disabilities or mobility limitations which may have precluded engagement in utilitarian walking in affected participants. This may have contributed to the attenuation of differences in mean BMI observed in older adults.

## Relation to Other Studies

The BMI findings are consistent with several recent studies which demonstrated lower prevalence of obesity in high walkability neighbourhoods compared to low walkability neighbourhoods [27 28 30 31]. Importantly, this study quantified the magnitude of the mean difference in BMI that was observed (2.64 kg/m<sup>2</sup>), and found that this clinically meaningful difference varied across three age categories. In one previous longitudinal study of 701 participants, residential relocation involving a 10-point increase in street address Walk Score<sup>®</sup> was associated with an average within-individual BMI reduction of 0.06 kg/m<sup>2</sup> [50]. The magnitude of this effect was smaller than the 2.64 kg/m<sup>2</sup> difference in mean BMI that was observed in this study, between the highest and lowest neighbourhood walkability quartiles (a difference of about 20-60 points in aggregate neighbourhood Walk Score<sup>®</sup>). Importantly, the scale at which walkability was measured in the present study was at the larger neighbourhood level, rather than at the level of each resident's individual address. This has interesting implications for determining the spatial scale at which a built environment might exert positive health effects mediated by walkability and utilitarian physical activity.

1  
2  
3  
4 With respect to blood pressure, one previous study that measured walkability and fast-  
5 food outlet density reported an association with blood pressure decreases in older adults [51],  
6 while another study found no association between walkability and self-reported hypertension  
7 [31]. Based on a systematic review and meta-analysis, the effect size of aerobic exercise on  
8 blood pressure reduction has been reported as -3.84 mmHg for sBP and -2.58 mmHg for dBP  
9 [52]. In the context of previous findings, it is plausible that the small differences in mean sBP  
10 and dBP in the current study may be attributable to differences in levels of physical activity,  
11 such as utilitarian walking.

12  
13 Although previous studies have found an association between neighbourhood walkability  
14 and both the prevalence and incidence of diabetes [28 30 32], associations between  
15 neighbourhood walkability and HbA1c have not been reported. In a systematic review and  
16 meta-analysis of 23 RCTs, structured aerobic exercise durations of 150 minutes or less per  
17 week were found to be associated with HbA1c reductions of 0.36% [53]. The observed  
18 difference in mean HbA1c in this study was considerably smaller. This suggests that the level  
19 of physical activity potentially promoted by a more walkable neighbourhood may not be strongly  
20 associated with clinically significant changes to HbA1c. Another possibility is that the observed  
21 relationship between neighbourhood walkability and mean HbA1c may have been confounded  
22 by variations in individual diet as well as in the larger food environment. Furthermore, given that  
23 neighbourhood walkability is associated with BMI and obesity prevalence, both of which  
24 influence the risk of diabetes, this may explain the finding of higher incidence and prevalence of  
25 diabetes in higher walkability neighbourhoods, rather than simply an independent effect of  
26 walkability on diabetes.  
27  
28

29  
30 An association between neighbourhood walkability and objective cholesterol parameters  
31 has not been previously reported in the peer-reviewed literature. One previous study reported a  
32 lack of an association between walkability and self-reported hypercholesterolemia [31]. In a  
33 Cochrane review of exercise effects on overweight or obesity, an HDL improvement of 0.06  
34 mmol/L was found among those who engaged in moderate aerobic exercise compared to  
35 controls with no treatment [54]. This suggests that, in the current study, the observed difference  
36 in mean HDL between the highest and lowest neighbourhood walkability quartiles is of a  
37 magnitude that could be plausibly attributed to a physical activity effect. The lack of consistent  
38 differences in other cholesterol parameters between the highest and lowest walkability quartiles  
39 is not incompatible with the literature. Indeed, a review of 51 studies, including 28 RCTs, of the  
40 effect of aerobic exercise training on blood lipids found that an increase in HDL was the most  
41 frequently observed outcome, and reductions in total cholesterol, LDL, and triglyceride were  
42 less commonly seen [55]. Again, the current study did not control for dietary factors, which are  
43 known to influence cholesterol parameters [56], and the observed associations should be  
44 interpreted with this in mind.  
45

### 46 **Implications of Findings for Population Health**

47  
48  
49 From a clinical perspective, recognizing the relative walkability of a patient's residential  
50 neighbourhood may aid health providers in making context-appropriate physical activity  
51 recommendations for health maintenance and chronic disease management. More importantly,  
52 the implications for walkable environments as a public health intervention are significant if the  
53 health associations for walkability presented in this and other studies represent a truly causal  
54 relationship. In other words, a highly walkable neighbourhood could represent a population-  
55 wide intervention capable of conferring multiple benefits related to obesity prevention, blood  
56 pressure control, and potentially even blood glucose and lipid control. At the population level,  
57 even small changes in average BMI or blood pressure have the potential to "shift the curve" with  
58  
59  
60

1  
2  
3 respect to the population distribution of disease risk. By lowering the average level of risk  
4 factors, such a population strategy targets the determinants of disease incidence and may have  
5 the capacity to prevent a considerable fraction of obesity, hypertension, diabetes, and  
6 cardiovascular disease that is attributed to physical inactivity [57 58].  
7

8  
9 One final issue of relevance for policy makers is that of equity. This study demonstrated  
10 that across 140 neighbourhoods within a single city, variations in health existed based on  
11 walkability characteristics of the built environment. Addressing the determinants of health and  
12 health equity at the population level should therefore include consideration of the built  
13 environment.  
14

## 15 CONCLUSIONS

16  
17 There is a clinically meaningful association between living in a neighbourhood in the  
18 highest walkability quartile and having lower BMI and modestly lower blood pressure. This  
19 study demonstrates that EMR data can be a source of objective clinical measures for population  
20 health research. Further longitudinal studies on walkable environments are needed to provide a  
21 realistic estimate of the magnitude and distribution of their health effects on the population, and  
22 to clarify the spatial scale at which neighbourhood walkability realizes these effects. Further  
23 research is also needed to examine the broader health and non-health impacts of walkable  
24 neighbourhoods, particularly if they are implemented as a built environment intervention at the  
25 population level.  
26  
27  
28

### 29 Details of Contributors

30 CKJL conceptualized the study. CKJL and DL designed the analyses in consultation with MG  
31 and BA. CKJL cleaned and analyzed the data, and drafted the manuscript. All authors  
32 contributed to revising the paper.  
33  
34

### 35 Funding Statement

36 This research received no specific grant from any funding agency in the public, commercial or  
37 not-for-profit sectors.  
38  
39

### 40 Competing Interests

41 "Competing interests: All authors have completed the ICMJE uniform disclosure form at  
42 [www.icmje.org/coi\\_disclosure.pdf](http://www.icmje.org/coi_disclosure.pdf) and declare: no support from any organisation for the  
43 submitted work; no financial relationships with any organisations that might have an interest in  
44 the submitted work in the previous three years; no other relationships or activities that could  
45 appear to have influenced the submitted work."  
46  
47  
48

### 49 Ethics Approval

50 This study was reviewed and approved by the Canadian Primary Care Sentinel Surveillance  
51 Network (CPCSSN) Research, Privacy and Ethics Officer and by the London School of Hygiene  
52 and Tropical Medicine MSc Research Ethics Committee.  
53  
54

### 55 Data Sharing

56 No additional data available.  
57  
58  
59  
60

## References

1. Institute for Health Metrics and Evaluation. Global Burden of Disease. GBD Compare | Viz Hub, 2013.
2. Tremblay MS, Warburton DER, Janssen I, et al. New Canadian Physical Activity Guidelines. *Applied Physiology, Nutrition, and Metabolism* 2011;**36**(1):36-46 doi: 10.1139/H11-009[published Online First: Epub Date]].
3. Department of Health. UK Physical Activity Guidelines, 2011.
4. US Department of Health and Human Services. 2008 Physical Activity Guidelines for Americans, 2008.
5. Brauer P, Connor Gorber S, Shaw E, et al. Recommendations for prevention of weight gain and use of behavioural and pharmacologic interventions to manage overweight and obesity in adults in primary care. *Canadian Medical Association Journal* 2015 doi: 10.1503/cmaj.140887[published Online First: Epub Date]].
6. *Obesity: Identification, Assessment and Management of Overweight and Obesity in Children, Young People and Adults: Partial Update of CG43*. London: National Clinical Guideline Centre, 2014., 2014.
7. Jensen MD, Ryan DH, Apovian CM, et al. 2013 AHA/ACC/TOS guideline for the management of overweight and obesity in adults: a report of the American College of Cardiology/American Heart Association Task Force on Practice Guidelines and The Obesity Society. *Circulation* 2014;**129**(25 Suppl 2):S102-38 doi: 10.1161/01.cir.0000437739.71477.ee[published Online First: Epub Date]].
8. Moyer VA. Screening for and management of obesity in adults: U.S. Preventive Services Task Force recommendation statement. *Annals of internal medicine* 2012;**157**(5):373-8 doi: 10.7326/0003-4819-157-5-201209040-00475[published Online First: Epub Date]].
9. Daskalopoulou SS, Rabi DM, Zarnke KB, et al. The 2015 Canadian Hypertension Education Program recommendations for blood pressure measurement, diagnosis, assessment of risk, prevention, and treatment of hypertension. *Canadian Journal of Cardiology* 2015;**31**(5):549-68
10. James PA, Oparil S, Carter BL, et al. 2014 evidence-based guideline for the management of high blood pressure in adults: Report from the panel members appointed to the eighth joint national committee (jnc 8). *JAMA* 2014;**311**(5):507-20 doi: 10.1001/jama.2013.284427[published Online First: Epub Date]].
11. McCormack T, Krause T, O'Flynn N. Management of hypertension in adults in primary care: NICE guideline. *The British Journal of General Practice* 2012;**62**(596):163-64 doi: 10.3399/bjgp12X630232[published Online First: Epub Date]].
12. Canadian Diabetes Association Clinical Practice Guidelines Expert Committee. Canadian Diabetes Association 2013 clinical practice guidelines for the prevention and management of diabetes in Canada. *Canadian Journal of Diabetes* 2013;**37**(suppl 1)
13. National Institute for Health and Care Excellence (NICE). Type 2 diabetes in adults: management: National Institute for Health and Care Excellence, 2015.
14. Association AD. 4. Foundations of care: education, nutrition, physical activity, smoking cessation, psychosocial care, and immunization. *Diabetes Care* 2015;**38**(Supplement 1):S20-S30
15. Anderson TJ, Grégoire J, Hegele RA, et al. 2012 update of the Canadian Cardiovascular Society guidelines for the diagnosis and treatment of dyslipidemia for the prevention of cardiovascular disease in the adult. *Canadian journal of cardiology* 2013;**29**(2):151-67
16. Stone NJ, Robinson JG, Lichtenstein AH, et al. 2013 ACC/AHA Guideline on the Treatment of Blood Cholesterol to Reduce Atherosclerotic Cardiovascular Risk in Adults A Report of the American College of Cardiology/American Heart Association Task Force on Practice Guidelines. *Journal of the American College of Cardiology* 2014;**63**(25\_PA):2889-934 doi: 10.1016/j.jacc.2013.11.002[published Online First: Epub Date]].



17. National Institute for Health and Care Excellence (NICE). Cardiovascular disease: risk assessment and reduction, including lipid modification: National Institute for Health and Care Excellence, 2014.
18. National Institute for Health and Care Excellence (NICE). Physical activity and the environment. Public health guideline: National Institute for Health and Care Excellence, 2008.
19. Mowat D, Gardner C, McKeown D, Tran N, Moloughney B, Bursey G. Improving health by design in the Greater Toronto-Hamilton Area. A Report of Medical Officers of Health in the GTHA 2014.
20. The Ottawa Charter for Health Promotion. First International Conference on Health Promotion; 1986 November 21, 1986; Ottawa.
21. Duncan DT, Aldstadt J, Whalen J, Melly SJ, Gortmaker SL. Validation of Walk Score® for Estimating Neighborhood Walkability: An Analysis of Four US Metropolitan Areas. *International Journal of Environmental Research and Public Health* 2011;**8**(11):4160-79
22. Glazier RH, Weyman JT, Creatore MI, et al. Development and validation of an urban walkability index for Toronto, Canada. *Toronto Community Health Profiles Partnership*, 2012.
23. Sallis JF, Cerin E, Conway TL, et al. Physical activity in relation to urban environments in 14 cities worldwide: a cross-sectional study. *The Lancet* 2016;**387**(10034):2207-17
24. Freeman L, Neckerman K, Schwartz-Soicher O, et al. Neighborhood walkability and active travel (walking and cycling) in New York City. *Journal of Urban Health* 2013;**90**(4):575-85
25. Thielman J, Rosella L, Copes R, Lebenbaum M, Manson H. Neighborhood walkability: Differential associations with self-reported transport walking and leisure-time physical activity in Canadian towns and cities of all sizes. *Preventive medicine* 2015;**77**:174-80 doi: <http://dx.doi.org/10.1016/j.ypmed.2015.05.011>[published Online First: Epub Date]].
26. Arvidsson D, Eriksson U, Lonn SL, Sundquist K. Neighborhood Walkability, Income, and Hour-by-Hour Physical Activity Patterns. *Medicine & Science in Sports & Exercise* 2013;**45**(4):698-705
27. Chiu M, Shah BR, Maclagan LC, Rezai M-R, Austin PC, Tu JV. Walk Score and the prevalence of utilitarian walking and obesity among Ontario adults: a cross-sectional study. *Statistics Canada Catalogue no.82-003-X Health Reports* 2015;**26**(7):3-10
28. Glazier RH, Creatore MI, Weyman JT, et al. Density, Destinations or Both? A Comparison of Measures of Walkability in Relation to Transportation Behaviors, Obesity and Diabetes in Toronto, Canada. *PLoS ONE* 2014;**9**(1):e85295 doi: 10.1371/journal.pone.0085295[published Online First: Epub Date]].
29. Hajna S, Ross NA, Joseph L, Harper S, Dasgupta K. Neighbourhood walkability, daily steps and utilitarian walking in Canadian adults. *BMJ Open* 2015;**5**(11) doi: 10.1136/bmjopen-2015-008964[published Online First: Epub Date]].
30. Creatore MI, Glazier RH, Moineddin R, et al. Association of Neighborhood Walkability With Change in Overweight, Obesity, and Diabetes. *JAMA* 2016;**315**(20):2211-20 doi: 10.1001/jama.2016.5898[published Online First: Epub Date]].
31. Müller-Riemenschneider F, Pereira G, Villanueva K, et al. Neighborhood walkability and cardiometabolic risk factors in Australian adults: an observational study. *BMC Public Health* 2013;**13**(1):1-9 doi: 10.1186/1471-2458-13-755[published Online First: Epub Date]].
32. Booth GL, Creatore MI, Moineddin R, et al. Unwalkable neighborhoods, poverty, and the risk of diabetes among recent immigrants to Canada compared with long-term residents. *Diabetes Care* 2013;**36**(2):302-08
33. Chiu M, Rezai M-R, Maclagan LC, et al. Moving to a Highly Walkable Neighborhood and Incidence of Hypertension: A Propensity-Score Matched Cohort Study. *Environ Health Perspect* 2015
34. Birtwhistle R, Keshavjee K, Lambert-Lanning A, et al. Building a pan-Canadian primary care sentinel surveillance network: initial development and moving forward. *The Journal of the American Board of Family Medicine* 2009;**22**(4):412-22

- 1
- 2
- 3
- 4 35. Walk Score. Walk Score Methodology. Secondary Walk Score Methodology 2015.  
5 <https://www.walkscore.com/methodology.shtml>.
- 6 36. City of Toronto. Neighbourhood Profiles. Secondary Neighbourhood Profiles 2015.  
7 <http://www1.toronto.ca/wps/portal/contentonly?vgnextoid=ae17962c8c3f0410VgnVCM1000071d60f89RCRD&vgnextchannel=1e68f40f9aae0410VgnVCM10000071d60f89RCRD>.
- 8
- 9 37. Walk Score. Living in Toronto: Toronto Neighborhoods. Secondary Living in Toronto: Toronto  
10 Neighborhoods 2015. <https://www.walkscore.com/CA-ON/Toronto>.
- 11 38. Social Development Finance & Administration, City of Toronto. Boundaries of City of Toronto  
12 Neighbourhoods. Secondary Boundaries of City of Toronto Neighbourhoods 2014.  
13 <http://www1.toronto.ca/wps/portal/contentonly?vgnextoid=04b489fe9c18b210VgnVCM1000003dd60f89RCRD&vgnextchannel=75d6e03bb8d1e310VgnVCM10000071d60f89RCRD>.
- 14
- 15 39. Statistics Canada. Postal Code Conversion File (PCCF) Reference Guide: June 2013 postal codes.  
16 Catalogue no. 92-154-G: Statistics Canada, 2013.
- 17 40. Statistics Canada. Forward Sortation Area Boundary File, Reference Guide: Census year 2011.  
18 Catalogue no. 92-179-G: Statistics Canada, 2011.
- 19 41. Williamson T, Green ME, Birtwhistle R, et al. Validating the 8 CPCSSN Case Definitions for Chronic  
20 Disease Surveillance in a Primary Care Database of Electronic Health Records. *Annals of Family  
21 Medicine* 2014;**12**(4):367-72 doi: 10.1370/afm.1644[published Online First: Epub Date] |.
- 22 42. Friesen D, Rajagopalan P, Strashin J. Toronto Crime by Neighbourhood. Secondary Toronto Crime by  
23 Neighbourhood April 15, 2015 2011. <http://www.cbc.ca/toronto/features/crimemap/>.
- 24 43. Toronto Community Health Profiles Partnership. DA & CT ON-Marg Data, 2006., 2006.
- 25 44. Toronto Community Health Profiles Partnership. Ontario Marginalization Index (ON-Marg).  
26 Secondary Ontario Marginalization Index (ON-Marg) 2015.  
27 <http://www.torontohealthprofiles.ca/onmarg.php>.
- 28 45. Ekoé J-M, Punthakee Z, Ransom T, Prebtani APH, Goldenberg R. Screening for Type 1 and Type 2  
29 Diabetes. *Canadian Journal of Diabetes* 2013;**37**(Supplement):S12-S15
- 30 46. Matheson FI, Dunn J, Smith KLW, Moineddin R, Glazier RH. Ontario Marginalization Index User Guide  
31 Version 1.0. Toronto: Centre for Research on Inner City Health, 2012.
- 32 47. Manaugh K, El-Geneidy A. Validating walkability indices: How do different households respond to the  
33 walkability of their neighborhood? *Transportation research part D: transport and environment*  
34 2011;**16**(4):309-15
- 35 48. Carr LJ, Dunsiger SI, Marcus BH. Walk score™ as a global estimate of neighborhood walkability.  
36 *American Journal of Preventive Medicine* 2010;**39**(5):460-63
- 37 49. City of Toronto, City Planning Social Policy Analysis & Research. 2011 Census: Age and Sex Counts.  
38 Toronto: City of Toronto, 2012.
- 39 50. Hirsch JA, Diez Roux AV, Moore KA, Evenson KR, Rodriguez DA. Change in walking and body mass  
40 index following residential relocation: the multi-ethnic study of atherosclerosis. *American  
41 Journal of Public Health* 2014;**104**(3):e49-e56
- 42 51. Li F, Harmer P, Cardinal BJ, Vongjaturapat N. Built environment and changes in blood pressure in  
43 middle aged and older adults. *Preventive medicine* 2009;**48**(3):237-41
- 44 52. Whelton SP, Chin A, Xin X, He J. Effect of aerobic exercise on blood pressure: a meta-analysis of  
45 randomized, controlled trials. *Annals of internal medicine* 2002;**136**(7):493-503
- 46 53. Umpierre D, Ribeiro PA, Kramer CK, et al. Physical activity advice only or structured exercise training  
47 and association with HbA1c levels in type 2 diabetes: a systematic review and meta-analysis.  
48 *JAMA* 2011;**305**(17):1790-99
- 49 54. Shaw K, Gennat H, O'Rourke P, Del Mar C. Exercise for overweight or obesity. The Cochrane database  
50 of systematic reviews 2006(4):CD003817 doi: 10.1002/14651858.CD003817.pub3[published  
51 Online First: Epub Date] |.
- 52
- 53
- 54
- 55
- 56
- 57
- 58
- 59
- 60

- 1  
2  
3  
4  
5  
6  
7  
8  
9  
10  
11  
12  
13  
14  
15  
16  
17  
18  
19  
20  
21  
22  
23  
24  
25  
26  
27  
28  
29  
30  
31  
32  
33  
34  
35  
36  
37  
38  
39  
40  
41  
42  
43  
44  
45  
46  
47  
48  
49  
50  
51  
52  
53  
54  
55  
56  
57  
58  
59  
60
55. Leon AS, Sanchez OA. Response of blood lipids to exercise training alone or combined with dietary intervention. *Medicine and science in sports and exercise* 2001;**33**(6; SUPP):S502-S15
56. Third Report of the National Cholesterol Education Program (NCEP) Expert Panel on Detection, Evaluation, and Treatment of High Blood Cholesterol in Adults (Adult Treatment Panel III) final report. *Circulation* 2002;**106**(25):3143-421
57. Lee IM, Shiroma EJ, Lobelo F, Puska P, Blair SN, Katzmarzyk PT. Impact of Physical Inactivity on the World's Major Non-Communicable Diseases. *Lancet* (London, England) 2012;**380**(9838):219-29 doi: 10.1016/S0140-6736(12)61031-9[published Online First: Epub Date]].
58. Rose G. Sick individuals and sick populations. *International journal of epidemiology* 2001;**30**(3):427-32

For peer review only

**Supplementary Table 1. Adjusted linear regression coefficients comparing differences in mean health measures between the highest three quartiles (Q2-Q4) of neighbourhood walkability and the lowest quartile (Q1).** Results are presented for all ages and for each age category. Regression coefficients represent differences in the mean health measure, adjusting for covariates of age, sex, BMI (except in the model where BMI is the health outcome measure) current smoking status, relevant medications and medical diagnoses, neighbourhood violent crime rates, and neighbourhood indices of material deprivation, ethnic concentration, dependency, and residential instability.

| Health measure [unit]                             | Q2-Q1 regression coefficient<br>(95% CI) | p-value | Q3-Q1 regression coefficient<br>(95% CI) | p-value | Q4-Q1 regression coefficient<br>(95% CI) | p-value |
|---------------------------------------------------|------------------------------------------|---------|------------------------------------------|---------|------------------------------------------|---------|
| <b>BMI [kg/m<sup>2</sup>] – all ages ≥ 18</b>     | -2.00 (-2.22 to -1.78)                   | <0.001  | -2.02 (-2.25 to -1.79)                   | <0.001  | -2.64 (-2.98 to -2.30)                   | <0.001  |
| 18 ≤ age < 40                                     | -3.54 (-4.00 to -3.08)                   | <0.001  | -3.51 (-3.99 to -3.03)                   | <0.001  | -4.44 (-5.09 to -3.79)                   | <0.001  |
| 40 ≤ age ≤ 65                                     | -1.83 (-2.16 to -1.50)                   | <0.001  | -1.92 (-2.27 to -1.57)                   | <0.001  | -2.74 (-3.24 to -2.23)                   | <0.001  |
| age > 65                                          | -0.79 (-1.14 to -0.43)                   | <0.001  | -0.91 (-1.30 to -0.52)                   | <0.001  | -0.87 (-1.48 to -0.26)                   | 0.005   |
| <b>sBP [mmHg] – all ages ≥ 18</b>                 | 0.14 (-0.29 to 0.56)                     | 0.52    | -0.95 (-1.40 to -0.50)                   | <0.001  | -1.35 (-2.01 to -0.70)                   | <0.001  |
| 18 ≤ age < 40                                     | 0.30 (-0.44 to 1.04)                     | 0.43    | -0.75 (-1.52 to 0.018)                   | 0.056   | -0.64 (-1.68 to 0.41)                    | 0.23    |
| 40 ≤ age ≤ 65                                     | 0.21 (-0.40 to 0.83)                     | 0.49    | -0.74 (-1.39 to -0.095)                  | 0.025   | -1.97 (-2.91 to -1.03)                   | <0.001  |
| age > 65                                          | 0.012 (-0.86 to 0.88)                    | 0.98    | -1.22 (-2.17 to -0.26)                   | 0.012   | -0.64 (-2.14 to 0.85)                    | 0.40    |
| <b>dBp [mmHg] – all ages ≥ 18</b>                 | -0.42 (-0.72 to -0.13)                   | 0.005   | -0.33 (-0.64 to -0.012)                  | 0.042   | -0.60 (-1.06 to -0.14)                   | 0.010   |
| 18 ≤ age < 40                                     | -0.47 (-1.04 to 0.10)                    | 0.11    | -0.29 (-0.89 to 0.30)                    | 0.33    | 0.12 (-0.68 to 0.93)                     | 0.76    |
| 40 ≤ age ≤ 65                                     | -0.26 (-0.68 to 0.16)                    | 0.23    | -0.31 (-0.75 to 0.13)                    | 0.16    | -1.30 (-1.94 to -0.66)                   | <0.001  |
| age > 65                                          | -0.69 (-1.24 to -0.14)                   | 0.014   | -0.57 (-1.18 to 0.030)                   | 0.063   | -0.19 (-1.13 to 0.75)                    | 0.69    |
| <b>HbA1c [%] – all ages ≥ 18</b>                  | -0.035 (-0.060 to -0.0093)               | 0.007   | -0.041 (-0.068 to -0.014)                | 0.003   | -0.063 (-0.11 to -0.021)                 | 0.003   |
| 18 ≤ age < 40                                     | -0.027 (-0.10 to 0.047)                  | 0.47    | -0.051 (-0.13 to 0.027)                  | 0.20    | -0.12 (-0.23 to -0.019)                  | 0.021   |
| 40 ≤ age ≤ 65                                     | -0.037 (-0.075 to 0.00049)               | 0.053   | -0.046 (-0.086 to -0.0055)               | 0.026   | -0.059 (-0.12 to 0.0026)                 | 0.060   |
| age > 65                                          | -0.018 (-0.054 to 0.018)                 | 0.34    | -0.015 (-0.055 to 0.018)                 | 0.46    | -0.013 (-0.078 to 0.051)                 | 0.69    |
| <b>FBG [mmol/L] – all ages ≥ 18</b>               | 0.0098 (-0.031 to 0.051)                 | 0.64    | 0.0041 (-0.041 to 0.049)                 | 0.86    | 0.030 (-0.038 to 0.099)                  | 0.39    |
| 18 ≤ age < 40                                     | -0.020 (-0.12 to 0.081)                  | 0.69    | -0.072 (-0.18 to 0.039)                  | 0.20    | -0.086 (-0.24 to 0.073)                  | 0.29    |
| 40 ≤ age ≤ 65                                     | 0.0060 (-0.052 to 0.064)                 | 0.84    | 0.00032 (-0.062 to 0.063)                | 0.99    | 0.028 (-0.068 to 0.12)                   | 0.57    |
| age > 65                                          | 0.018 (-0.050 to 0.085)                  | 0.60    | 0.032 (-0.043 to 0.11)                   | 0.40    | 0.083 (-0.036 to 0.20)                   | 0.17    |
| <b>total cholesterol [mmol/L] – all ages ≥ 18</b> | 0.038 (0.00077 to 0.074)                 | 0.045   | 0.020 (-0.019 to 0.060)                  | 0.31    | 0.061 (0.00025 to 0.12)                  | 0.049   |
| 18 ≤ age < 40                                     | -0.029 (-0.13 to 0.074)                  | 0.58    | -0.047 (-0.16 to 0.063)                  | 0.40    | -0.023 (-0.18 to 0.13)                   | 0.77    |
| 40 ≤ age ≤ 65                                     | 0.066 (0.016 to 0.12)                    | 0.010   | 0.041 (-0.013 to 0.095)                  | 0.13    | 0.11 (0.024 to 0.19)                     | 0.012   |
| age > 65                                          | 0.039 (-0.019 to 0.096)                  | 0.19    | -0.012 (-0.075 to 0.051)                 | 0.72    | -0.023 (-0.13 to 0.078)                  | 0.65    |
| <b>HDL [mmol/L] – all ages ≥ 18</b>               | 0.0046 (-0.0093 to 0.019)                | 0.52    | 0.0018 (-0.013 to 0.017)                 | 0.82    | 0.052 (0.029 to 0.075)                   | <0.001  |
| 18 ≤ age < 40                                     | -0.039 (-0.078 to 0.00044)               | 0.053   | -0.054 (-0.096 to -0.012)                | 0.012   | 0.022 (0.038 to 0.081)                   | 0.47    |
| 40 ≤ age ≤ 65                                     | -0.00062 (-0.020 to 0.019)               | 0.95    | 0.0014 (-0.019 to 0.022)                 | 0.90    | 0.052 (0.020 to 0.084)                   | 0.001   |
| age > 65                                          | 0.028 (0.0044 to 0.051)                  | 0.020   | 0.021 (-0.0043 to 0.047)                 | 0.10    | 0.060 (0.019 to 0.10)                    | 0.004   |
| <b>LDL [mmol/L] – all ages ≥ 18</b>               | 0.016 (-0.015 to 0.047)                  | 0.31    | 0.0084 (-0.025 to 0.042)                 | 0.62    | 0.010 (-0.041 to 0.062)                  | 0.69    |
| 18 ≤ age < 40                                     | -0.014 (-0.10 to 0.071)                  | 0.74    | 0.0014 (-0.090 to 0.093)                 | 0.98    | -0.0088 (-0.14 to 0.12)                  | 0.89    |
| 40 ≤ age ≤ 65                                     | 0.033 (-0.010 to 0.077)                  | 0.13    | 0.016 (-0.030 to 0.062)                  | 0.49    | 0.026 (-0.044 to 0.096)                  | 0.47    |
| age > 65                                          | 0.019 (-0.029 to 0.067)                  | 0.44    | -0.015 (-0.068 to 0.038)                 | 0.59    | -0.036 (-0.12 to 0.049)                  | 0.41    |
| <b>triglyceride [mmol/L] – all ages ≥ 18</b>      | 0.031 (0.00050 to 0.061)                 | 0.046   | 0.019 (-0.013 to 0.052)                  | 0.24    | -0.0031 (-0.053 to 0.047)                | 0.90    |
| 18 ≤ age < 40                                     | 0.0079 (-0.12 to 0.13)                   | 0.90    | -0.051 (-0.18 to 0.082)                  | 0.46    | -0.14 (-0.33 to 0.047)                   | 0.14    |
| 40 ≤ age ≤ 65                                     | 0.056 (0.014 to 0.097)                   | 0.009   | 0.035 (-0.010 to 0.079)                  | 0.13    | 0.038 (-0.029 to 0.11)                   | 0.27    |
| age > 65                                          | 0.00043 (-0.041 to 0.042)                | 0.98    | -0.0032 (-0.049 to 0.042)                | 0.89    | -0.041 (-0.11 to 0.033)                  | 0.28    |

## RESEARCH CHECKLIST

**STROBE Statement**—Checklist of items that should be included in reports of *cross-sectional studies*

|                              | Item No | Recommendation                                                                                                                                                                                                                                                                                                                                                                                                                                      |
|------------------------------|---------|-----------------------------------------------------------------------------------------------------------------------------------------------------------------------------------------------------------------------------------------------------------------------------------------------------------------------------------------------------------------------------------------------------------------------------------------------------|
| <b>Title and abstract</b>    | 1       | (a) Indicate the study's design with a commonly used term in the title or the abstract ✓ (p. 2)<br>(b) Provide in the abstract an informative and balanced summary of what was done and what was found ✓ (p.2)                                                                                                                                                                                                                                      |
| <b>Introduction</b>          |         |                                                                                                                                                                                                                                                                                                                                                                                                                                                     |
| Background/rationale         | 2       | Explain the scientific background and rationale for the investigation being reported ✓ (p. 4)                                                                                                                                                                                                                                                                                                                                                       |
| Objectives                   | 3       | State specific objectives, including any prespecified hypotheses ✓ (p. 4)                                                                                                                                                                                                                                                                                                                                                                           |
| <b>Methods</b>               |         |                                                                                                                                                                                                                                                                                                                                                                                                                                                     |
| Study design                 | 4       | Present key elements of study design early in the paper ✓ (p. 4)                                                                                                                                                                                                                                                                                                                                                                                    |
| Setting                      | 5       | Describe the setting, locations, and relevant dates, including periods of recruitment, exposure, follow-up, and data collection ✓ (p.4-5)                                                                                                                                                                                                                                                                                                           |
| Participants                 | 6       | (a) Give the eligibility criteria, and the sources and methods of selection of participants ✓ (p. 4-5)                                                                                                                                                                                                                                                                                                                                              |
| Variables                    | 7       | Clearly define all outcomes, exposures, predictors, potential confounders, and effect modifiers. Give diagnostic criteria, if applicable ✓ (p.4-6)                                                                                                                                                                                                                                                                                                  |
| Data sources/<br>measurement | 8*      | For each variable of interest, give sources of data and details of methods of assessment (measurement). Describe comparability of assessment methods if there is more than one group ✓ (p. 4-5)                                                                                                                                                                                                                                                     |
| Bias                         | 9       | Describe any efforts to address potential sources of bias ✓ (p. 4-6)                                                                                                                                                                                                                                                                                                                                                                                |
| Study size                   | 10      | Explain how the study size was arrived at ✓ (p.6)                                                                                                                                                                                                                                                                                                                                                                                                   |
| Quantitative variables       | 11      | Explain how quantitative variables were handled in the analyses. If applicable, describe which groupings were chosen and why ✓ (p. 5-6)                                                                                                                                                                                                                                                                                                             |
| Statistical methods          | 12      | (a) Describe all statistical methods, including those used to control for confounding ✓ (p. 5-6)<br>(b) Describe any methods used to examine subgroups and interactions ✓ (p. 6)<br>(c) Explain how missing data were addressed – data from EMR; N indicated for each variable of interest ✓ (p. 4-6, 8)<br>(d) If applicable, describe analytical methods taking account of sampling strategy – N/A<br>(e) Describe any sensitivity analyses – N/A |
| <b>Results</b>               |         |                                                                                                                                                                                                                                                                                                                                                                                                                                                     |
| Participants                 | 13*     | (a) Report numbers of individuals at each stage of study—eg numbers potentially eligible, examined for eligibility, confirmed eligible, included in the study, completing follow-up, and analysed ✓ (p. 6)<br>(b) Give reasons for non-participation at each stage ✓ (p. 6)<br>(c) Consider use of a flow diagram ✓ (p. 6)                                                                                                                          |
| Descriptive data             | 14*     | (a) Give characteristics of study participants (eg demographic, clinical, social) and information on exposures and potential confounders ✓ (p. 7-8)<br>(b) Indicate number of participants with missing data for each variable of interest – data from EMR; N indicated for each variable of interest ✓ (p. 8)                                                                                                                                      |
| Outcome data                 | 15*     | Report numbers of outcome events or summary measures ✓ (p. 8)                                                                                                                                                                                                                                                                                                                                                                                       |

|    |                          |    |                                                                                                                                                                                                                           |
|----|--------------------------|----|---------------------------------------------------------------------------------------------------------------------------------------------------------------------------------------------------------------------------|
| 1  |                          |    |                                                                                                                                                                                                                           |
| 2  |                          |    |                                                                                                                                                                                                                           |
| 3  | Main results             | 16 | (a) Give unadjusted estimates and, if applicable, confounder-adjusted estimates and their precision (eg, 95% confidence interval). Make clear which confounders were adjusted for and why they were included ✓ (p. 10-11) |
| 4  |                          |    |                                                                                                                                                                                                                           |
| 5  |                          |    |                                                                                                                                                                                                                           |
| 6  |                          |    |                                                                                                                                                                                                                           |
| 7  |                          |    | (b) Report category boundaries when continuous variables were categorized ✓ (p. 8-11)                                                                                                                                     |
| 8  |                          |    |                                                                                                                                                                                                                           |
| 9  |                          |    | (c) If relevant, consider translating estimates of relative risk into absolute risk for a meaningful time period – N/A                                                                                                    |
| 10 |                          |    |                                                                                                                                                                                                                           |
| 11 | Other analyses           | 17 | Report other analyses done—eg analyses of subgroups and interactions, and sensitivity analyses ✓ (p. 6, 11)                                                                                                               |
| 12 |                          |    |                                                                                                                                                                                                                           |
| 13 |                          |    |                                                                                                                                                                                                                           |
| 14 | <b>Discussion</b>        |    |                                                                                                                                                                                                                           |
| 15 | Key results              | 18 | Summarise key results with reference to study objectives ✓ (p. 11)                                                                                                                                                        |
| 16 | Limitations              | 19 | Discuss limitations of the study, taking into account sources of potential bias or imprecision. Discuss both direction and magnitude of any potential bias ✓ (p. 12)                                                      |
| 17 |                          |    |                                                                                                                                                                                                                           |
| 18 |                          |    |                                                                                                                                                                                                                           |
| 19 | Interpretation           | 20 | Give a cautious overall interpretation of results considering objectives, limitations, multiplicity of analyses, results from similar studies, and other relevant evidence ✓ (p. 11-14)                                   |
| 20 |                          |    |                                                                                                                                                                                                                           |
| 21 |                          |    |                                                                                                                                                                                                                           |
| 22 |                          |    |                                                                                                                                                                                                                           |
| 23 | Generalisability         | 21 | Discuss the generalisability (external validity) of the study results ✓ (p. 12)                                                                                                                                           |
| 24 |                          |    |                                                                                                                                                                                                                           |
| 25 | <b>Other information</b> |    |                                                                                                                                                                                                                           |
| 26 | Funding                  | 22 | Give the source of funding and the role of the funders for the present study and, if applicable, for the original study on which the present article is based – N/A                                                       |
| 27 |                          |    |                                                                                                                                                                                                                           |
| 28 |                          |    |                                                                                                                                                                                                                           |

\*Give information separately for exposed and unexposed groups.

**Note:** An Explanation and Elaboration article discusses each checklist item and gives methodological background and published examples of transparent reporting. The STROBE checklist is best used in conjunction with this article (freely available on the Web sites of PLoS Medicine at <http://www.plosmedicine.org/>, Annals of Internal Medicine at <http://www.annals.org/>, and Epidemiology at <http://www.epidem.com/>). Information on the STROBE Initiative is available at [www.strobe-statement.org](http://www.strobe-statement.org).

# BMJ Open

## Association between neighbourhood walkability and metabolic risk factors influenced by physical activity: a cross-sectional study of adults in Toronto, Canada

|                                 |                                                                                                                                                                                                                                                                                                                                                                                                                             |
|---------------------------------|-----------------------------------------------------------------------------------------------------------------------------------------------------------------------------------------------------------------------------------------------------------------------------------------------------------------------------------------------------------------------------------------------------------------------------|
| Journal:                        | <i>BMJ Open</i>                                                                                                                                                                                                                                                                                                                                                                                                             |
| Manuscript ID                   | bmjopen-2016-013889.R1                                                                                                                                                                                                                                                                                                                                                                                                      |
| Article Type:                   | Research                                                                                                                                                                                                                                                                                                                                                                                                                    |
| Date Submitted by the Author:   | 27-Jan-2017                                                                                                                                                                                                                                                                                                                                                                                                                 |
| Complete List of Authors:       | Loo, C K Jennifer; University of Toronto Dalla Lana School of Public Health, Public Health and Preventive Medicine<br>Greiver, Michelle; University of Toronto, Department of Family and Community Medicine<br>Aliarzadeh, Babak; University of Toronto, Department of Family and Community Medicine<br>Lewis, Daniel; London School of Hygiene and Tropical Medicine, Department of Social & Environmental Health Research |
| <b>Primary Subject Heading</b>: | Public health                                                                                                                                                                                                                                                                                                                                                                                                               |
| Secondary Subject Heading:      | Public health, Diabetes and endocrinology                                                                                                                                                                                                                                                                                                                                                                                   |
| Keywords:                       | built environment, active transportation, obesity, neighbourhood walkability, utilitarian walking, metabolic risk                                                                                                                                                                                                                                                                                                           |
|                                 |                                                                                                                                                                                                                                                                                                                                                                                                                             |

SCHOLARONE™  
Manuscripts

Only

1  
2  
3 **ASSOCIATION BETWEEN NEIGHBOURHOOD WALKABILITY AND METABOLIC RISK**  
4 **FACTORS INFLUENCED BY PHYSICAL ACTIVITY: A CROSS-SECTIONAL STUDY OF**  
5 **ADULTS IN TORONTO, CANADA**  
6

7 CK Jennifer Loo<sup>1</sup>, Michelle Greiver<sup>2,4</sup>, Babak Aliarzadeh<sup>2,4</sup>, Daniel Lewis<sup>3</sup>  
8

9  
10 <sup>1</sup>Dalla Lana School of Public Health, University of Toronto, 155 College Street, Toronto, Ontario, Canada,  
11 M5T 3M7

12 <sup>2</sup>Department of Family and Community Medicine, University of Toronto, 500 University Avenue, 5th Floor,  
13 Toronto, Ontario, M5G 1V7  
14 Canada

15 <sup>3</sup> Department of Social and Environmental Health Research, Faculty of Public Health and Policy, London  
16 School of Hygiene and Tropical Medicine, UK.

17 <sup>4</sup>North York General Hospital, 4001 Leslie Street, Toronto, ON M2K 1E1, Canada  
18  
19

20 **Manuscript Authors**  
21

22 CK Jennifer Loo

23 Resident Physician, Dalla Lana School of Public Health, University of Toronto, Toronto, Ontario,  
24 Canada  
25

26 Michelle Greiver

27 Associate Professor, Department of Family and Community Medicine, University of Toronto,  
28 Toronto, Ontario, Canada  
29

30 Babak Aliarzadeh

31 Data Analytics Manager, Department of Family and Community Medicine, University of Toronto,  
32 Toronto, Ontario, Canada  
33  
34

35 Daniel Lewis

36 Research Fellow, Department of Social & Environmental Health Research, London School of  
37 Hygiene and Tropical Medicine, London, UK.  
38  
39

40 **Correspondence to:**  
41

42 CK Jennifer Loo

43 Public Health & Preventive Medicine

44 Dalla Lana School of Public Health, University of Toronto

45 155 College Street, Toronto ON Canada, M5T 3M7

46 (+1)-416-357-1212

47 [jennifer.loo@mail.utoronto.ca](mailto:jennifer.loo@mail.utoronto.ca)  
48  
49  
50

51 **Key Words:** active transportation, neighbourhood walkability, built environment, metabolic risk,  
52 obesity, utilitarian walking  
53  
54

55 **Word Count:** 3960 words  
56  
57  
58  
59  
60



1  
2  
3  
4  
5  
6  
7  
8  
9  
10  
11  
12  
13  
14  
15  
16  
17  
18  
19  
20  
21  
22  
23  
24  
25  
26  
27  
28  
29  
30  
31  
32  
33  
34  
35  
36  
37  
38  
39  
40  
41  
42  
43  
44  
45  
46  
47  
48  
49  
50  
51  
52  
53  
54  
55  
56  
57  
58  
59  
60

## TITLE

**Association between neighbourhood walkability and metabolic risk factors influenced by physical activity: a cross-sectional study of adults in Toronto, Canada**

## ABSTRACT

**Objective:** To determine whether neighbourhood walkability is associated with clinical measures of obesity, hypertension, diabetes, and dyslipidemia in an urban adult population.

**Design:** Observational cross-sectional study

**Setting:** Urban primary care patients

**Participants:** 78,023 Toronto residents, aged 18 years and over, who were formally rostered or had at least two visits between 2012-2014 with a primary care physician participating in the University of Toronto Practice Based Research Network (UTOPIAN), within the Canadian Primary Care Sentinel Surveillance Network (CPCSSN).

**Main outcome measures:** Differences in average body mass index (BMI), systolic and diastolic blood pressure, fasting blood glucose, hemoglobin A1c, total cholesterol, high-density lipoprotein, low-density lipoprotein, and triglyceride between residents in the highest versus the lowest quartile of neighbourhood walkability, as estimated using multivariable linear regression models and stratified by age. Outcomes were objectively measured and were retrieved from primary care electronic medical records. Models adjusted for age, sex, smoking, medications, medical comorbidities and indices of neighbourhood safety and marginalization.

**Results:** Compared to those in the lowest walkability quartile, individuals in the highest quartile had lower mean BMI (-2.64 kg/m<sup>2</sup>, 95% CI -2.98 to -2.30; p<0.001), systolic blood pressure (-1.35 mmHg, 95% CI -2.01 to -0.70; p<0.001), diastolic blood pressure (-0.60 mmHg, 95% CI -1.06 to -0.14; p=0.010), and hemoglobin A1c (-0.063%, 95% CI -0.11 to -0.021; p=0.003), and higher mean high-density lipoprotein (0.052 mmol/L, 95% CI 0.029 to 0.075; p<0.001). In age-stratified analyses, differences in mean BMI were consistently observed for adults aged 18 to under 40 (-4.44 kg/m<sup>2</sup>, 95% CI -5.09 to -3.79; p<0.001), adults aged 40-65 (-2.74 kg/m<sup>2</sup>, 95% CI -3.24 to -2.23; p<0.001), and adults aged over 65 (-0.87 kg/m<sup>2</sup>, 95% CI -1.48 to -0.26; p=0.005).

**Conclusions:** There was a clinically meaningful association between living in the most walkable neighbourhoods and having lower BMI in adults of all ages.

**STRENGTHS AND LIMITATIONS OF THIS STUDY**

- This neighbourhood walkability study is unique in examining a set of objectively measured metabolic risk factors, all of which are known to change with physical activity.
- We used electronic medical record data, which allowed us to control for patient-level covariates and express results in a clinically meaningful way.
- It was not possible to control for diet or the food environment with our study data.
- The cross-sectional study design could not rule out a residential selection effect in which individuals with healthier lifestyles may choose to reside in more walkable neighbourhoods.

For peer review only

## INTRODUCTION

Increasing physical activity can significantly impact disability adjusted life years (DALYs) in developed countries. This is because many of the top risk factors associated with excess morbidity and mortality – high body mass index, high blood pressure, high glycemic levels, and high cholesterol – are all impacted by exercise [1]. Clinical practice guidelines consistently recommend physical activity, both as part of a healthy lifestyle [2-4] and as non-pharmacologic therapy for overweight and obesity [5-8], hypertension [9-11], diabetes [12-14], and dyslipidemia [15-17].

At the population level, public health professionals have advocated for the use of built environment designs that support or promote active transportation such as utilitarian walking or cycling [18 19]. Utilitarian walking describes non-recreational walking that is used as a mode of transportation, commonly in the course of conducting errands, or traveling to and from school or work [20 21]. By recognizing neighbourhood design as a way to influence health behaviours and “build in” physical activity into daily living, this population health approach advances health promotion to sectors beyond health care, toward the creation of public policies and environments that support health [22].

Multiple scales have been developed and validated to measure aspects of a neighbourhood’s built environment that promote pedestrian walking [23 24]. Characteristics such as residential density, intersection density, and public transport density have been shown to influence walkability and physical activity [25]. Current evidence suggests that greater neighbourhood walkability is associated with increased physical activity, through walking for transport or utilitarian walking [26-31]. Studies using survey or administrative data have found associations between areas of higher walkability and population-level health outcomes such as lower prevalence and incidence of obesity and diabetes [30 32-34], and lower incidence of hypertension [35]. However, there is limited information on objectively measured metabolic risk factors which are known to change with physical activity.

This study examined the association between relative residential neighbourhood walkability and objectively measured metabolic risk factors in an urban adult population.

## METHODS

This study used an observational cross-sectional design and linked routinely collected electronic medical record (EMR) data with neighborhood-level characteristics.

### Study Population

The study population included patients, aged 18 and above, seen by a primary care physician participating in the University of Toronto Practice Based Research Network (UTOPIAN). UTOPIAN is one of 11 Primary Care Practice Based Research Networks that are part of the Canadian Primary Care Sentinel Surveillance Network (CPCSSN). CPCSSN is a multi-disease surveillance system where primary care physicians contribute de-identified EMR data to a national database [36]. In Canada, universal access to primary care services is publicly funded, and in the province of Ontario, where Toronto is situated, 94% of residents have a primary care provider [37]. Patients who were enrolled with, or who had at least two visits with a CPCSSN-UTOPIAN primary care physician between January 1, 2012 and December 31, 2014 and who had a valid City of Toronto residential postal code were included in this study. Data were extracted as of December 31, 2014 using procedures previously described [36].

## Measure of Neighbourhood Walkability

The walkability of each individual's residential neighbourhood was measured using Walk Score<sup>®</sup>, a validated index that calculates the walkability of an address based on distance to amenities and aspects of pedestrian friendliness including population density, block length, and intersection density [38]. Increasing Walk Score<sup>®</sup> has been linked to increased utilitarian walking and decreased obesity prevalence in Ontario, Canada [29]. In this walkability index, locations are scored from 0 to 100, where 100 is the most walkable [38]. Toronto has 140 neighbourhoods, each of which is an administrative area that covers several city blocks, and has a minimum population of 7,000 to 10,000 [39]. Neighbourhood-level Walk Scores<sup>®</sup> for all Toronto neighbourhoods are publicly available online [40] and represent a population-weighted aggregation of a grid of Walk Score<sup>®</sup> points for the entire area of a neighbourhood, as delineated by administrative boundaries [38]. The Walk Scores current as of 2014 were retrieved [40]. Based on their residential postal code, participants were assigned to a Toronto neighbourhood using Toronto neighbourhood and postal code area shapefiles [41-43] with ESRI ArcGIS ArcMap V.10.1.

## Health Outcome Measures

The health outcome measures in this study were body mass index (BMI), systolic and diastolic blood pressure (sBP, dBP), fasting blood glucose (FBG), hemoglobin A1c (HbA1c), total cholesterol (TC), high-density lipoprotein (HDL), low-density lipoprotein (LDL), and triglyceride (TG). These measures were selected because they represent widely accepted indicators of obesity, hypertension, glycemic control, and dyslipidemia, for which target ranges are well-established in clinical practice guidelines [5-17]. If multiple values were present between 2012-2014, the most recent record was used for data analysis. Given that the study sample was derived from a primary care patient population, the collection of these health measures represented the full spectrum of clinical testing: screening of healthy and at-risk individuals, diagnosis of individuals, and monitoring of individuals with chronic conditions for disease control and therapy optimization.

## Covariates

Individual and neighbourhood level covariates were measured. Individual health and socio-demographic characteristics obtained from CPCSSN-UTOPIAN data included key variables that can influence the clinical outcome measures of interest: patient age, sex, current smoking status, presence of a diagnosis of hypertension or diabetes, and presence of a prescription for a weight-loss medication, an anti-hypertensive medication, an anti-diabetic medication, or a lipid-lowering medication. Diagnoses of hypertension and diabetes were based upon validated CPCSSN case definitions and case-finding algorithms [44].

Neighbourhood rates of violent crime reported to the Toronto Police Service (i.e. assault, sexual assault, robbery, and murder) were used as an indicator of neighbourhood safety [45], given the possibility that neighbourhood crime and perception of safety may influence utilitarian walking [21]. Due to the link between marginalization and health, the Ontario Marginalization Index scores of Toronto neighbourhoods were also included as covariates [46 47]. This index uses census data and assigns scores across four specific dimensions that contribute to the process of marginalization. Material deprivation scores incorporated measures of unemployment, low income, low education, and low-quality housing. Ethnic concentration scores accounted for recent immigration and self-identification as a visible minority. Residential instability scores were

1  
2  
3 derived from multiple indicators, including the proportion of the population who had moved in the  
4 previous five years, and the proportion of dwellings that were not owned. Dependency scores  
5 included indicators measuring the proportion of the population aged 65 and older and the  
6 proportion of the population not participating in the labour force [46 47].  
7

## 8 **Statistical Analyses**

9  
10  
11 Descriptive statistics were calculated for demographic variables, health outcome  
12 measures and all covariates. Toronto neighbourhood walkability was visualized with a choropleth  
13 map. Means and 95% confidence intervals (95% CI) of all health measures were calculated for  
14 the highest and lowest neighbourhood walkability quartiles and significance testing was  
15 performed on the unadjusted means using t-tests assuming equal variances. Multivariable linear  
16 regression models were also used to compare mean health measures in the highest versus the  
17 lowest walkability quartile. All models were adjusted for covariates of age, sex, smoking status,  
18 neighbourhood rates of violent crime and neighbourhood indices of material deprivation, ethnic  
19 concentration, residential instability and dependency from the Ontario Marginalization Index.  
20 Models predicting BMI were also adjusted for the presence of a weight-loss medication. Models  
21 predicting blood pressure were adjusted for BMI, the presence of a hypertension diagnosis and  
22 prescription of anti-hypertensive medication. Models predicting HbA1c and FBG were adjusted  
23 for BMI, the presence of a diabetes diagnosis and prescription of anti-diabetic medication. Models  
24 predicting cholesterol (total cholesterol, HDL, LDL, TG) were adjusted for BMI and the presence  
25 of a prescription for lipid-lowering medication. There were insufficient observations within each  
26 neighbourhood to use multilevel models. However, to ensure that the use of non-hierarchical  
27 linear regression was appropriate, intraclass correlation coefficients (ICCs) were calculated. Low  
28 ICCs for each health outcome (ICC=0.050 for BMI, ICC<0.01 for all other outcomes) revealed  
29 that very little of the total variance was accounted for by clustering within neighbourhoods, and  
30 that a non-hierarchical approach was reasonable.  
31  
32

33  
34 Differences in health measures across walkability quartiles were examined for all ages,  
35 and in stratified analyses across three age subgroups of 18 to under 40 years, 40 to 65 years,  
36 and over 65 years. Broadly, these age categories represent segments of the population where  
37 primary versus secondary prevention strategies may be relevant in distinct ways. A younger adult  
38 population is more amenable to primary prevention of chronic disease. Both primary and  
39 secondary prevention are relevant for middle-aged adults, and notably, they undergo lipid and  
40 diabetes screening as recommended by clinical practice guidelines [15 48]. Finally, older adults  
41 may differ from younger adults due to increased medical comorbidities that affect the health  
42 markers of interest, and due to potentially decreased mobility that may affect levels of walking  
43 and physical activity.  
44

45  
46 All data were analyzed using Stata IC/ V.12.1 and mapping was carried out using ESRI  
47 ArcGIS ArcMap V.10.1. This study was reviewed and approved by the CPCSSN Research  
48 Privacy and Ethics Officer and by the London School of Hygiene and Tropical Medicine MSc  
49 Research Ethics Committee.  
50

## 51 **RESULTS**

52  
53  
54 78, 023 UTOPIAN patients met the inclusion criteria. The generation of the study sample  
55 is displayed in Figure 1.  
56  
57  
58  
59  
60

1  
2  
3  
4  
5  
6  
7  
8  
9  
10  
11  
12  
13  
14  
15  
16  
17  
18  
19  
20  
21  
22  
23  
24  
25  
26  
27  
28  
29  
30  
31  
32  
33  
34  
35  
36  
37  
38  
39  
40  
41  
42  
43  
44  
45  
46  
47  
48  
49  
50  
51  
52  
53  
54  
55  
56  
57  
58  
59  
60

**Figure 1.** Sequence of steps in generation of study sample.

For peer review only

1  
2  
3  
4  
5  
6  
7  
8  
9  
10  
11  
12  
13  
14  
15  
16  
17  
18  
19  
20  
21  
22  
23  
24  
25  
26  
27  
28  
29  
30  
31  
32  
33  
34  
35  
36  
37  
38  
39  
40  
41  
42  
43  
44  
45  
46  
47  
48  
49  
50  
51  
52  
53  
54  
55  
56  
57  
58  
59  
60

Characteristics of the study sample are displayed in Table 1. Residents of the lowest and highest quartiles of neighbourhood walkability were similar with respect to age, proportion of women and proportion of smokers. Neighbourhoods in the highest walkability quartile had higher violent crime rates, somewhat lower deprivation scores, but similar ethnic concentration compared to neighbourhoods in the lowest quartile. A map of Toronto's 140 neighbourhoods and their Walk Scores® is displayed in Figure 2. The most walkable neighbourhoods were concentrated in Toronto's downtown core. Neighbourhood Walk Scores® ranged from 42 to 99.

Unadjusted means and 95% CIs for all health measures in the lowest and highest quartiles of neighbourhood walkability are displayed in Table 2. All differences in unadjusted means were significant at the  $p < 0.001$  level.

Table 1. Descriptive characteristics of study participants.

| Characteristic                                                         | Lowest Quartile of Neighbourhood Walkability |               |                      | Highest Quartile of Neighbourhood Walkability |              |                      | Total Study Population |               |                      |
|------------------------------------------------------------------------|----------------------------------------------|---------------|----------------------|-----------------------------------------------|--------------|----------------------|------------------------|---------------|----------------------|
|                                                                        | Frequency (%)                                | Mean (SD)     | N patients with data | Frequency (%)                                 | Mean (SD)    | N patients with data | Frequency (%)          | Mean (SD)     | N patients with data |
| <b>Sex (female)</b>                                                    | 11,303 (62.3%)                               |               | 18,137               | 11,399 (62.7%)                                |              | 18,192               | 48,556 (62.2%)         |               | 78,022               |
| <b>Age [years]</b>                                                     |                                              | 49.2 (19.2)   | 18,122               |                                               | 48.5 (17.9)  | 18,180               |                        | 50.0 (19.2)   | 77,966               |
| 18≤age<40                                                              | 6,448 (35.6%)                                |               |                      | 6,895 (37.9%)                                 |              |                      | 26,977 (34.6%)         |               |                      |
| 40≤age≤65                                                              | 7,731 (42.7%)                                |               |                      | 7,760 (42.7%)                                 |              |                      | 33,056 (42.4%)         |               |                      |
| >65 years                                                              | 3,943 (21.8%)                                |               |                      | 3,525 (19.4%)                                 |              |                      | 17,933 (23.0%)         |               |                      |
| <b>Smoking (current smoker)</b>                                        | 1,530 (12.0%)                                |               | 12,772               | 1,669 (13.3%)                                 |              | 12,511               | 6,808 (12.1%)          |               | 56,093               |
| <b>Anthropometric indicators</b>                                       |                                              |               |                      |                                               |              |                      |                        |               |                      |
| Body Mass Index (BMI) [kg/m <sup>2</sup> ]                             |                                              | 29.6 (10.0)   | 9,819                |                                               | 26.0 (6.22)  | 10,920               |                        | 27.2 (7.4)    | 46,029               |
| Overweight or obese (BMI≥25 kg/m <sup>2</sup> )                        | 6,370 (64.9%)                                |               | 9,819                | 5,505 (50.4%)                                 |              | 10,920               | 26,309 (57.2%)         |               | 46,029               |
| Prescribed weight-loss medication                                      | 1,146 (6.3%)                                 |               | 18,137               | 523 (2.9%)                                    |              | 18,192               | 3,387 (4.3%)           |               | 78,023               |
| <b>Blood pressure control</b>                                          |                                              |               |                      |                                               |              |                      |                        |               |                      |
| Hypertension diagnosis                                                 | 4,068 (22.4%)                                |               | 18,137               | 2,980 (16.4%)                                 |              | 18,192               | 16,241 (20.8%)         |               | 78,023               |
| Prescribed anti-hypertensive medication                                | 4,796 (26.4%)                                |               | 18,137               | 3,555 (19.5%)                                 |              | 18,192               | 19,020 (24.4%)         |               | 78,023               |
| Systolic blood pressure (sBP) [mmHg]                                   |                                              | 121.5 (16.0)  | 13,722               |                                               | 117.4 (15.5) | 13,950               |                        | 119.8 (16.0)  | 59,634               |
| Diastolic blood pressure (dBp) [mmHg]                                  |                                              | 75.0 (10.0)   | 13,722               |                                               | 73.1 (10.0)  | 13,950               |                        | 73.8 (10.0)   | 59,634               |
| <b>Blood glucose control</b>                                           |                                              |               |                      |                                               |              |                      |                        |               |                      |
| Diabetes diagnosis                                                     | 2,242 (12.4%)                                |               | 18,137               | 1,096 (6.0%)                                  |              | 18,192               | 6,988 (9.0%)           |               | 78,023               |
| Prescribed anti-diabetic medication                                    | 1,788 (9.9%)                                 |               | 18,137               | 786 (4.3%)                                    |              | 18,192               | 5,220 (6.7%)           |               | 78,023               |
| Hemoglobin A1c (HbA1c) [%]                                             |                                              | 6.10 (1.10)   | 6,721                |                                               | 5.74 (0.75)  | 5,570                |                        | 5.89 (0.88)   | 29,575               |
| Fasting blood glucose (FBG) [mmol/L]                                   |                                              | 5.56 (1.70)   | 8,388                |                                               | 5.32 (1.26)  | 6,367                |                        | 5.42 (1.46)   | 34,698               |
| <b>Lipid control</b>                                                   |                                              |               |                      |                                               |              |                      |                        |               |                      |
| Prescribed lipid-lowering medication                                   | 3,686 (20.3%)                                |               | 18,137               | 2,453 (13.5%)                                 |              | 18,192               | 13,979 (17.9%)         |               | 78,023               |
| Total cholesterol (TC) [mmol/L]                                        |                                              | 4.73 (1.08)   | 8,690                |                                               | 4.93 (1.04)  | 6,825                |                        | 4.81 (1.06)   | 36,498               |
| High density lipoprotein (HDL) [mmol/L]                                |                                              | 1.43 (0.41)   | 8,844                |                                               | 1.58 (0.47)  | 7,014                |                        | 1.49 (0.44)   | 37,295               |
| Low density lipoprotein (LDL) [mmol/L]                                 |                                              | 2.71 (0.90)   | 8,770                |                                               | 2.78 (0.88)  | 6,983                |                        | 2.74 (0.89)   | 37,097               |
| Triglycerides (TG) [mmol/L]                                            |                                              | 1.34 (1.05)   | 8,883                |                                               | 1.26 (0.79)  | 7,008                |                        | 1.31 (0.87)   | 37,417               |
| <b>Neighbourhood violent crime rate* [events per 10,000 residents]</b> |                                              | 95.4 (49.8)   | 18,137               |                                               | 128.2 (84.3) | 18,192               |                        | 91.3 (59.6)   | 78,023               |
| <b>Neighbourhood Instability Score<sup>†</sup></b>                     |                                              | -0.048 (0.48) | 18,137               |                                               | 1.37 (0.68)  | 18,192               |                        | 0.480 (0.71)  | 78,023               |
| <b>Neighbourhood Deprivation Score<sup>†</sup></b>                     |                                              | 0.30 (0.96)   | 18,137               |                                               | -0.53 (0.69) | 18,192               |                        | -0.170 (0.77) | 78,023               |
| <b>Neighbourhood Ethnic Concentration Score<sup>†</sup></b>            |                                              | 1.78 (0.89)   | 18,137               |                                               | 0.82 (0.89)  | 18,192               |                        | 1.353 (1.08)  | 78,023               |
| <b>Neighbourhood Dependency Score<sup>†</sup></b>                      |                                              | -0.020 (0.36) | 18,137               |                                               | -0.44 (0.27) | 18,192               |                        | -0.100 (0.39) | 78,023               |

SD—standard deviation, N—number of observations in study sample

\*Violent crime includes occurrences of assault, sexual assault, robbery, and murder.

†Scores of neighbourhood instability, deprivation, ethnic concentration and dependency are dimensions of the Ontario Marginalization Index [49]. Scores are population-weighted, and higher values indicate greater instability/deprivation/ethnic concentration/dependency.



1  
2  
3  
4  
5  
6  
7 **Figure 2.** Map of Toronto neighbourhood walkability as measured by neighbourhood Walk Scores®. Walk Scores® for Toronto neighbourhoods  
8 (n=140) were retrieved from the City of Toronto Open Data Catalogue [40].  
9  
10  
11  
12  
13  
14  
15  
16  
17  
18  
19  
20  
21  
22  
23  
24  
25  
26  
27  
28  
29  
30  
31  
32  
33  
34  
35  
36  
37  
38  
39  
40  
41  
42  
43  
44  
45  
46  
47  
48  
49

For peer review only

**Table 2. Unadjusted means and 95% confidence intervals (95% CIs) for health measures in the lowest and highest quartiles of neighbourhood walkability.**

| Health measure [unit]                      | Mean (95% CI) in Lowest Quartile of Neighbourhood Walkability | Mean (95% CI) in Highest Quartile of Neighbourhood Walkability |
|--------------------------------------------|---------------------------------------------------------------|----------------------------------------------------------------|
| Body Mass Index (BMI) [kg/m <sup>2</sup> ] | 29.6 (29.5–29.8)                                              | 26.0 (25.9–26.2)*                                              |
| Systolic blood pressure (sBP) [mmHg]       | 121.5 (121.2–121.7)                                           | 117.4 (117.2–117.7)*                                           |
| Diastolic blood pressure (dBP) [mmHg]      | 75.0 (74.8–75.1)                                              | 73.1 (72.9–73.3)*                                              |
| Hemoglobin A1c (HbA1c) [%]                 | 6.10 (6.08–6.12)                                              | 5.74 (5.72–5.76)*                                              |
| Fasting blood glucose (FBG) [mmol/L]       | 5.56 (5.53–5.59)                                              | 5.32 (5.28–5.35)*                                              |
| Total cholesterol (TC) [mmol/L]            | 4.73 (4.71–4.75)                                              | 4.93 (4.91–4.96)*                                              |
| High density lipoprotein (HDL) [mmol/L]    | 1.43 (1.42–1.44)                                              | 1.58 (1.57–1.59)*                                              |
| Low density lipoprotein (LDL) [mmol/L]     | 2.71 (2.69–2.73)                                              | 2.78 (2.76–2.80)*                                              |
| Triglycerides (TG) [mmol/L]                | 1.34 (1.32–1.36)                                              | 1.26 (1.24–1.28)*                                              |

\*Asterisks indicate a significant difference between the unadjusted means at the highest versus the lowest walkability quartile, using t-tests at a significance level of  $p < 0.001$ .

Table 3 displays the adjusted linear regression coefficients comparing differences in mean health measures between the highest and lowest quartiles of neighbourhood walkability. Data for all quartiles are reported in Supplementary Table 1. After adjusting for covariates, there were statistically significant differences in average measures of BMI, sBP, dBP, HbA1c, and HDL between participants in the highest versus the lowest walkability quartile.

Mean BMI was 2.64 kg/m<sup>2</sup> lower (95% CI -2.98 to -2.30,  $p < 0.001$ ) among individuals in the highest versus the lowest neighbourhood walkability quartile. In the stratified analyses, this difference was greatest in those aged 18 to under 40, where mean BMI was -4.44 kg/m<sup>2</sup> lower (95% CI -5.09 to -3.79,  $p < 0.001$ ), and smallest in those over age 65, where mean BMI was 0.87 kg/m<sup>2</sup> lower (95% CI -1.48 to -0.26,  $p = 0.005$ ).

When comparing average blood pressure measurements of individuals in the highest versus the lowest walkability quartile, mean sBP was 1.35 mmHg lower (95% CI -2.01 to -0.70,  $p < 0.001$ ) and mean dBP was 0.60 mmHg lower (95% CI -1.06 to -0.14,  $p = 0.010$ ). When stratifying by age categories, significant differences in mean sBP and dBP were observed only in those aged 40 to 65.

With respect to blood glucose control, mean HbA1c was 0.063% lower (95% CI -0.11 to -0.021,  $p = 0.003$ ) in those within the highest neighbourhood walkability quartile compared to those in the lowest quartile. After age stratification, a statistically significant difference was only present in those aged 18 to under 40. No evidence of differences in mean FBG was observed between the highest and the lowest quartiles of neighbourhood walkability.

In terms of cholesterol parameters, mean HDL was 0.052 mmol/L higher (95% CI 0.029 to 0.075,  $p < 0.001$ ) in those in the highest versus the lowest neighbourhood walkability quartile. Across the age subgroups, a significant difference in mean HDL was present only in the two older age categories. The difference observed in mean TC was of borderline statistical significance, and in the stratified analyses, was only significant in those aged 40 to 65. No strong evidence of differences in other cholesterol parameters was apparent.

**Table 3. Adjusted linear regression coefficients comparing differences in mean health measures between the highest and lowest quartiles of neighbourhood walkability.** Results are presented for all ages and for each age sub-category. Regression coefficients represent differences in the mean health measure, adjusting for covariates of age, sex, current smoking status, BMI (except in the model where BMI is the health outcome measure) relevant medications and medical diagnoses, neighbourhood violent crime rates, and neighbourhood indices of material deprivation, ethnic concentration, dependency, and residential instability.

| Health measure [unit]                         | Regression coefficient (95% CI) | p-value |
|-----------------------------------------------|---------------------------------|---------|
| <b>BMI [kg/m<sup>2</sup>] – all ages ≥ 18</b> | -2.64 (-2.98 to -2.30)          | <0.001  |
| 18 ≤ age < 40                                 | -4.44 (-5.09 to -3.79)          | <0.001  |
| 40 ≤ age ≤ 65                                 | -2.74 (-3.24 to -2.23)          | <0.001  |
| age > 65                                      | -0.87 (-1.48 to -0.26)          | 0.005   |
| <b>sBP [mmHg] – all ages ≥ 18</b>             | -1.35 (-2.01 to -0.70)          | <0.001  |
| 18 ≤ age < 40                                 | -0.64 (-1.68 to 0.41)           | 0.23    |
| 40 ≤ age ≤ 65                                 | -1.97 (-2.91 to -1.03)          | <0.001  |
| age > 65                                      | -0.64 (-2.14 to 0.85)           | 0.40    |
| <b>dBp [mmHg] – all ages ≥ 18</b>             | -0.60 (-1.06 to -0.14)          | 0.010   |
| 18 ≤ age < 40                                 | 0.12 (-0.68 to 0.93)            | 0.76    |
| 40 ≤ age ≤ 65                                 | -1.30 (-1.94 to -0.66)          | <0.001  |
| age > 65                                      | -0.19 (-1.13 to 0.75)           | 0.69    |
| <b>HbA1c [%] – all ages ≥ 18</b>              | -0.063 (-0.11 to -0.021)        | 0.003   |
| 18 ≤ age < 40                                 | -0.12 (-0.23 to -0.019)         | 0.021   |
| 40 ≤ age ≤ 65                                 | -0.059 (-0.12 to 0.0026)        | 0.060   |
| age > 65                                      | -0.013 (-0.078 to 0.051)        | 0.69    |
| <b>FBG [mmol/L] – all ages ≥ 18</b>           | 0.030 (-0.038 to 0.099)         | 0.39    |
| 18 ≤ age < 40                                 | -0.086 (-0.24 to 0.073)         | 0.29    |
| 40 ≤ age ≤ 65                                 | 0.028 (-0.068 to 0.12)          | 0.57    |
| age > 65                                      | 0.083 (-0.036 to 0.20)          | 0.17    |
| <b>TC [mmol/L] – all ages ≥ 18</b>            | 0.061 (0.00025 to 0.12)         | 0.049   |
| 18 ≤ age < 40                                 | -0.023 (-0.18 to 0.13)          | 0.77    |
| 40 ≤ age ≤ 65                                 | 0.11 (0.024 to 0.19)            | 0.012   |
| age > 65                                      | -0.023 (-0.13 to 0.078)         | 0.65    |
| <b>HDL [mmol/L] – all ages ≥ 18</b>           | 0.052 (0.029 to 0.075)          | <0.001  |
| 18 ≤ age < 40                                 | 0.022 (0.038 to 0.081)          | 0.47    |
| 40 ≤ age ≤ 65                                 | 0.052 (0.020 to 0.084)          | 0.001   |
| age > 65                                      | 0.060 (0.019 to 0.10)           | 0.004   |
| <b>LDL [mmol/L] – all ages ≥ 18</b>           | 0.010 (-0.041 to 0.062)         | 0.69    |
| 18 ≤ age < 40                                 | -0.0088 (-0.14 to 0.12)         | 0.89    |
| 40 ≤ age ≤ 65                                 | 0.026 (-0.044 to 0.096)         | 0.47    |
| age > 65                                      | -0.036 (-0.12 to 0.049)         | 0.41    |
| <b>triglyceride [mmol/L] – all ages ≥ 18</b>  | -0.0031 (-0.053 to 0.047)       | 0.90    |
| 18 ≤ age < 40                                 | -0.14 (-0.33 to 0.047)          | 0.14    |
| 40 ≤ age ≤ 65                                 | 0.038 (-0.029 to 0.11)          | 0.27    |
| age > 65                                      | -0.041 (-0.11 to 0.033)         | 0.28    |

## DISCUSSION

### Key findings: Neighbourhood Walkability and Metabolic Risk Factors

We observed an association between higher neighborhood walkability and objectively measured metabolic risk factors. The magnitude of differences observed for BMI across all age groups, and for blood pressure in middle-aged adults were clinically significant and relevant for population health.

## Strengths and Limitations

The main strength of this study is that it used EMR data to examine a set of clinical measures known to change with physical activity, all of which were objectively measured through physical examination or laboratory testing. The study controlled for both individual clinical attributes, as well as neighbourhood-level covariates that could have confounded the relationship between neighbourhood walkability and the metabolic risk factors of interest [28 32 50 51].

Overall, the study population included a large and diverse sample of adults of all ages, with and without chronic disease. However, the application of the study findings to other adult populations in a developed, urban setting should also consider that these were primary care patients. In particular, the study population did not include children or adolescents, had more older adults, and had a greater proportion of women than the general population of Toronto [52]. With respect to major comorbidities, the prevalence of hypertension and diabetes in the study sample (20.8% and 9.0%, respectively) were comparable to the prevalence of these diseases in the general population of Toronto (22.7% and 10.4% respectively) [53 54]. The study sample had a higher prevalence of overweight or obesity of 57.2% compared to the published Toronto prevalence of 45.8% [53]. This may be related to the fact that the latter value is from self-reported population survey data, which is prone to underreporting of BMI [55]. National estimates that use directly measured BMI yield an overweight or obesity prevalence of 62% [56]. Given that CPCSSN is the first multi-disease, EMR-based surveillance system in Canada, further work would be of interest to characterize the sociodemographic and health attributes of participating patient populations, especially in relation to the general population.

The main limitation of this study is its cross-sectional nature, which precludes the establishment of temporality in the association between neighbourhood walkability and health outcomes. Importantly, it is not possible to rule out a residential selection effect, in which healthier individuals who choose to engage in more health-promoting behaviours, such as physical activity, may also choose to live in more walkable areas to facilitate their preferred lifestyle. In other studies that either controlled for neighbourhood self-selection, or were longitudinal in design, significant associations were still observed between neighbourhood walkability and levels of overweight or obesity [57 58]. This study did not control for leisure physical activity, which may also influence the measured clinical outcomes, but—unlike utilitarian walking—is not thought to be a key mediator of the putative health benefits of walkable built environments [20 21 29 59]. Based on a recent study in Ontario, Canada, which found that differences in leisure physical activity were not significant between individuals from areas of varying walkability [29], any significant confounding by leisure physical activity would have biased results toward the null and led to underestimation of effects in the present study. Dietary information could not be captured in a valid manner using electronic medical record (EMR) data in this study. It is possible that dietary habits, particularly as linked to the food environment, may differ between neighbourhoods of high versus low walkability [60 61] but the extent to which this may have affected estimates in this study is unclear. Similarly, this study did not control for major disabilities or mobility limitations which may have precluded engagement in utilitarian walking in affected participants. This may have contributed to the attenuation of differences in mean BMI observed in older adults. Future work that controls for mobility limitations would be of interest to better explore the effects of neighbourhood walkability in older populations, particularly given that an association between walkability and physical activity has been previously reported in adults aged 65 and older [62].

## Findings in Relation to Other Studies

1  
2  
3  
4 The BMI findings are consistent with several recent studies which demonstrated lower  
5 prevalence of obesity in high walkability neighbourhoods compared to low walkability  
6 neighbourhoods [29 30 33 34]. Importantly, this study quantified the magnitude of the mean  
7 difference in BMI that was observed (2.64 kg/m<sup>2</sup>), and found that this clinically meaningful  
8 difference varied across three age categories. In one previous longitudinal study of 701  
9 participants, residential relocation involving a 10-point increase in street address Walk Score<sup>®</sup>  
10 was associated with an average within-individual BMI reduction of 0.06 kg/m<sup>2</sup> [57]. The  
11 magnitude of this effect was smaller than the 2.64 kg/m<sup>2</sup> difference in mean BMI that was  
12 observed in this study, between the highest and lowest neighbourhood walkability quartiles (a  
13 difference of about 20-60 points in aggregate neighbourhood Walk Score<sup>®</sup>). Importantly, the scale  
14 at which walkability was measured in the present study was at the larger neighbourhood level,  
15 rather than at the level of each resident's individual address. This has interesting implications for  
16 determining the spatial scale at which a built environment might exert positive health effects  
17 mediated by walkability and utilitarian physical activity.  
18

19  
20 With respect to blood pressure, one previous study that measured walkability and fast-  
21 food outlet density reported an association with blood pressure decreases in older adults [60],  
22 while another study found no association between walkability and self-reported hypertension [34].  
23 The effect size of aerobic exercise on blood pressure reduction has been reported as -3.84 mmHg  
24 for sBP and -2.58 mmHg for dBP [63]. Thus, it is plausible that the small differences in mean sBP  
25 and dBP in the current study may be attributable to differences in levels of utilitarian walking. In  
26 the age-stratified analyses, only adults aged 40-65 demonstrated a significant difference in mean  
27 sBP and dBP. In Canada, the age-specific prevalence of hypertension follows an S-shaped  
28 curve, with a prevalence of 5.7% in adults aged 35-39, which rises steadily from 9.3% in adults  
29 aged 40-44 to 53.6% in adults aged 65-69 [64]. The lack of association in younger adults may  
30 be related to insufficient power in this study to detect blood pressure differences where  
31 hypertension prevalence is low. Alternatively, an association between walkable neighbourhoods  
32 and blood pressure may not exist or be relevant in younger adults, for which the incidence and  
33 risk of hypertension is already quite low (less than 1% incidence in Canadians under 40 years of  
34 age) [64]. In older adults, potential explanations for a lack of an association include decreased  
35 mobility and ability to engage in utilitarian walking, or the possibility that physical activity effects  
36 on blood pressure become relatively insignificant in the context of multiple medications and  
37 comorbidities in this age group.  
38

39  
40 Although previous studies have found an association between neighbourhood walkability  
41 and both the prevalence and incidence of diabetes [30 32 33], associations between  
42 neighbourhood walkability and HbA1c have not been reported. In a systematic review and meta-  
43 analysis of 23 RCTs, structured aerobic exercise durations of 150 minutes or less per week were  
44 found to be associated with HbA1c reductions of 0.36% [65]. The observed difference in mean  
45 HbA1c in this study was considerably smaller. This suggests that the level of physical activity  
46 potentially promoted by a more walkable neighbourhood may not be strongly associated with  
47 clinically significant changes to HbA1c. Another possibility is that the observed relationship  
48 between neighbourhood walkability and mean HbA1c may have been confounded by variations  
49 in individual diet as well as in the larger food environment. Furthermore, given that neighbourhood  
50 walkability is associated with BMI and obesity prevalence, both of which influence the risk of  
51 diabetes, this may explain the finding of higher incidence and prevalence of diabetes in higher  
52 walkability neighbourhoods, rather than simply an independent effect of walkability on diabetes.  
53  
54

55  
56 An association between neighbourhood walkability and objective cholesterol parameters  
57 has not been previously reported in the peer-reviewed literature. One previous study reported a  
58 lack of an association between walkability and self-reported hypercholesterolemia [34]. In a  
59  
60

1  
2  
3  
4  
5  
6  
7  
8  
9  
10  
11  
12  
13  
14  
15  
16  
17  
18  
19  
20  
21  
22  
23  
24  
25  
26  
27  
28  
29  
30  
31  
32  
33  
34  
35  
36  
37  
38  
39  
40  
41  
42  
43  
44  
45  
46  
47  
48  
49  
50  
51  
52  
53  
54  
55  
56  
57  
58  
59  
60

Cochrane review of exercise effects on overweight or obesity, an HDL improvement of 0.06 mmol/L was found among those who engaged in moderate aerobic exercise compared to controls with no treatment [66]. This suggests that, in the current study, the observed difference in mean HDL between the highest and lowest neighbourhood walkability quartiles is of a magnitude that could be plausibly attributed to a physical activity effect. The lack of consistent differences in other cholesterol parameters between the highest and lowest walkability quartiles is not incompatible with the literature. Indeed, a review of 51 studies, including 28 RCTs, of the effect of aerobic exercise training on blood lipids found that an increase in HDL was the most frequently observed outcome, and reductions in total cholesterol, LDL, and triglyceride were less commonly seen [67]. Again, the current study did not control for dietary factors, which are known to influence cholesterol parameters [68], and the observed associations should be interpreted with this in mind.

### Implications of Findings for Population Health

From a clinical perspective, recognizing the relative walkability of a patient's residential neighbourhood may aid health providers in making context-appropriate physical activity recommendations for health maintenance and chronic disease management. More importantly, the implications for walkable environments as a public health intervention are significant if the health associations for walkability presented in this and other studies represent a truly causal relationship. In other words, a highly walkable neighbourhood could represent a population-wide intervention capable of conferring multiple benefits related to obesity prevention, blood pressure control, and potentially even blood glucose and lipid control. At the population level, even small changes in average BMI or blood pressure have the potential to "shift the curve" with respect to the population distribution of disease risk. By lowering the average level of risk factors, such a population strategy targets the determinants of disease incidence and may have the capacity to prevent a considerable fraction of obesity, hypertension, diabetes, and cardiovascular disease that is attributed to physical inactivity [69 70].

One final issue of relevance for policy makers is that of equity. This study demonstrated that across 140 neighbourhoods within a single city, variations in health existed based on walkability characteristics of the built environment. Addressing the determinants of health and health equity at the population level should therefore include built environment considerations, such as access to public transportation and safe pedestrian infrastructure.

### CONCLUSIONS

There is a clinically meaningful association between living in a neighbourhood in the highest walkability quartile and having lower BMI and modestly lower blood pressure. This study demonstrates that EMR data can be a source of objective clinical measures for population health research. Further longitudinal studies on walkable environments are needed to provide a realistic estimate of the magnitude and distribution of their health effects on the population, and to clarify the spatial scale at which neighbourhood walkability realizes these effects. Further research is also needed to examine the broader health and non-health impacts of walkable neighbourhoods, particularly if they are implemented as a built environment intervention at the population level.

### Details of Contributors

1  
2  
3 CKJL conceptualized the study. CKJL and DL designed the analyses in consultation with MG  
4 and BA. CKJL cleaned and analyzed the data, and drafted the manuscript. All authors  
5 contributed to revising the paper.  
6  
7

### 8 **Funding Statement**

9 This research received no specific grant from any funding agency in the public, commercial or  
10 not-for-profit sectors.  
11  
12

### 13 **Competing Interests**

14 "Competing interests: All authors have completed the ICMJE uniform disclosure form at  
15 [www.icmje.org/coi\\_disclosure.pdf](http://www.icmje.org/coi_disclosure.pdf) and declare: no support from any organisation for the  
16 submitted work; no financial relationships with any organisations that might have an interest in  
17 the submitted work in the previous three years; no other relationships or activities that could  
18 appear to have influenced the submitted work."  
19  
20  
21

### 22 **Ethics Approval**

23 This study was reviewed and approved by the Canadian Primary Care Sentinel Surveillance  
24 Network (CPCSSN) Research, Privacy and Ethics Officer and by the London School of Hygiene  
25 and Tropical Medicine MSc Research Ethics Committee.  
26  
27  
28

### 29 **Data Sharing**

30 No additional data available.  
31  
32  
33  
34  
35  
36  
37  
38  
39  
40  
41  
42  
43  
44  
45  
46  
47  
48  
49  
50  
51  
52  
53  
54  
55  
56  
57  
58  
59  
60

## References

1. Institute for Health Metrics and Evaluation. Global Burden of Disease. GBD Compare | Viz Hub, 2013.
2. Tremblay MS, Warburton DER, Janssen I, et al. New Canadian Physical Activity Guidelines. *Applied Physiology, Nutrition, and Metabolism* 2011;**36**(1):36-46 doi: 10.1139/H11-009[published Online First: Epub Date]].
3. Department of Health. UK Physical Activity Guidelines, 2011.
4. US Department of Health and Human Services. 2008 Physical Activity Guidelines for Americans, 2008.
5. Brauer P, Connor Gorber S, Shaw E, et al. Recommendations for prevention of weight gain and use of behavioural and pharmacologic interventions to manage overweight and obesity in adults in primary care. *Canadian Medical Association Journal* 2015 doi: 10.1503/cmaj.140887[published Online First: Epub Date]].
6. *Obesity: Identification, Assessment and Management of Overweight and Obesity in Children, Young People and Adults: Partial Update of CG43*. London: National Clinical Guideline Centre, 2014., 2014.
7. Jensen MD, Ryan DH, Apovian CM, et al. 2013 AHA/ACC/TOS guideline for the management of overweight and obesity in adults: a report of the American College of Cardiology/American Heart Association Task Force on Practice Guidelines and The Obesity Society. *Circulation* 2014;**129**(25 Suppl 2):S102-38 doi: 10.1161/01.cir.0000437739.71477.ee[published Online First: Epub Date]].
8. Moyer VA. Screening for and management of obesity in adults: U.S. Preventive Services Task Force recommendation statement. *Annals of internal medicine* 2012;**157**(5):373-8 doi: 10.7326/0003-4819-157-5-201209040-00475[published Online First: Epub Date]].
9. Daskalopoulou SS, Rabi DM, Zarnke KB, et al. The 2015 Canadian Hypertension Education Program recommendations for blood pressure measurement, diagnosis, assessment of risk, prevention, and treatment of hypertension. *Canadian Journal of Cardiology* 2015;**31**(5):549-68
10. James PA, Oparil S, Carter BL, et al. 2014 evidence-based guideline for the management of high blood pressure in adults: Report from the panel members appointed to the eighth joint national committee (jnc 8). *JAMA* 2014;**311**(5):507-20 doi: 10.1001/jama.2013.284427[published Online First: Epub Date]].
11. McCormack T, Krause T, O'Flynn N. Management of hypertension in adults in primary care: NICE guideline. *The British Journal of General Practice* 2012;**62**(596):163-64 doi: 10.3399/bjgp12X630232[published Online First: Epub Date]].
12. Canadian Diabetes Association Clinical Practice Guidelines Expert Committee. Canadian Diabetes Association 2013 clinical practice guidelines for the prevention and management of diabetes in Canada. *Canadian Journal of Diabetes* 2013;**37**(suppl 1)
13. National Institute for Health and Care Excellence (NICE). Type 2 diabetes in adults: management: National Institute for Health and Care Excellence, 2015.
14. Association AD. 4. Foundations of care: education, nutrition, physical activity, smoking cessation, psychosocial care, and immunization. *Diabetes Care* 2015;**38**(Supplement 1):S20-S30
15. Anderson TJ, Grégoire J, Hegele RA, et al. 2012 update of the Canadian Cardiovascular Society guidelines for the diagnosis and treatment of dyslipidemia for the prevention of cardiovascular disease in the adult. *Canadian journal of cardiology* 2013;**29**(2):151-67
16. Stone NJ, Robinson JG, Lichtenstein AH, et al. 2013 ACC/AHA Guideline on the Treatment of Blood Cholesterol to Reduce Atherosclerotic Cardiovascular Risk in Adults A Report of the American College of Cardiology/American Heart Association Task Force on Practice Guidelines. *Journal of the American College of Cardiology* 2014;**63**(25\_PA):2889-934 doi: 10.1016/j.jacc.2013.11.002[published Online First: Epub Date]].



17. National Institute for Health and Care Excellence (NICE). Cardiovascular disease: risk assessment and reduction, including lipid modification: National Institute for Health and Care Excellence, 2014.
18. National Institute for Health and Care Excellence (NICE). Physical activity and the environment. Public health guideline: National Institute for Health and Care Excellence, 2008.
19. Mowat D, Gardner C, McKeown D, et al. Improving health by design in the Greater Toronto-Hamilton Area. A Report of Medical Officers of Health in the GTHA 2014.
20. Saelens BE, Handy SL. Built environment correlates of walking: a review. *Medicine & Science in Sports & Exercise* 2008;**40**(7 Suppl):S550
21. Sugiyama T, Neuhaus M, Cole R, et al. Destination and route attributes associated with adults' walking: a review. *Medicine & Science in Sports & Exercise* 2012;**44**(7):1275-86
22. The Ottawa Charter for Health Promotion. First International Conference on Health Promotion; 1986 November 21, 1986; Ottawa.
23. Duncan DT, Aldstadt J, Whalen J, et al. Validation of Walk Score® for Estimating Neighborhood Walkability: An Analysis of Four US Metropolitan Areas. *International Journal of Environmental Research and Public Health* 2011;**8**(11):4160-79
24. Glazier RH, Weyman JT, Creatore MI, et al. Development and validation of an urban walkability index for Toronto, Canada. Toronto Community Health Profiles Partnership, 2012.
25. Sallis JF, Cerin E, Conway TL, et al. Physical activity in relation to urban environments in 14 cities worldwide: a cross-sectional study. *The Lancet* 2016;**387**(10034):2207-17
26. Freeman L, Neckerman K, Schwartz-Soicher O, et al. Neighborhood walkability and active travel (walking and cycling) in New York City. *Journal of Urban Health* 2013;**90**(4):575-85
27. Thielman J, Rosella L, Copes R, et al. Neighborhood walkability: Differential associations with self-reported transport walking and leisure-time physical activity in Canadian towns and cities of all sizes. *Preventive medicine* 2015;**77**:174-80 doi: <http://dx.doi.org/10.1016/j.ypmed.2015.05.011>[published Online First: Epub Date]].
28. Arvidsson D, Eriksson U, Lonn SL, et al. Neighborhood Walkability, Income, and Hour-by-Hour Physical Activity Patterns. *Medicine & Science in Sports & Exercise* 2013;**45**(4):698-705
29. Chiu M, Shah BR, Maclagan LC, et al. Walk Score and the prevalence of utilitarian walking and obesity among Ontario adults: a cross-sectional study. *Statistics Canada Catalogue no.82-003-X Health Reports* 2015;**26**(7):3-10
30. Glazier RH, Creatore MI, Weyman JT, et al. Density, Destinations or Both? A Comparison of Measures of Walkability in Relation to Transportation Behaviors, Obesity and Diabetes in Toronto, Canada. *PLoS ONE* 2014;**9**(1):e85295 doi: 10.1371/journal.pone.0085295[published Online First: Epub Date]].
31. Hajna S, Ross NA, Joseph L, et al. Neighbourhood walkability, daily steps and utilitarian walking in Canadian adults. *BMJ Open* 2015;**5**(11) doi: 10.1136/bmjopen-2015-008964[published Online First: Epub Date]].
32. Booth GL, Creatore MI, Moineddin R, et al. Unwalkable neighborhoods, poverty, and the risk of diabetes among recent immigrants to Canada compared with long-term residents. *Diabetes Care* 2013;**36**(2):302-08
33. Creatore MI, Glazier RH, Moineddin R, et al. Association of Neighborhood Walkability With Change in Overweight, Obesity, and Diabetes. *JAMA* 2016;**315**(20):2211-20 doi: 10.1001/jama.2016.5898[published Online First: Epub Date]].
34. Müller-Riemenschneider F, Pereira G, Villanueva K, et al. Neighborhood walkability and cardiometabolic risk factors in Australian adults: an observational study. *BMC Public Health* 2013;**13**(1):1-9 doi: 10.1186/1471-2458-13-755[published Online First: Epub Date]].
35. Chiu M, Rezaei M-R, Maclagan LC, et al. Moving to a Highly Walkable Neighborhood and Incidence of Hypertension: A Propensity-Score Matched Cohort Study. *Environ Health Perspect* 2015

- 1
- 2
- 3
- 4 36. Birtwhistle R, Keshavjee K, Lambert-Lanning A, et al. Building a pan-Canadian primary care sentinel
- 5 surveillance network: initial development and moving forward. *The Journal of the American*
- 6 *Board of Family Medicine* 2009;**22**(4):412-22
- 7 37. Health Quality Ontario. *Quality in Primary Care: Setting a foundation for monitoring and reporting in*
- 8 *Ontario*. Toronto, 2015.
- 9 38. Walk Score. *Walk Score Methodology. Secondary Walk Score Methodology* 2015.
- 10 <https://www.walkscore.com/methodology.shtml>.
- 11 39. City of Toronto. *Neighbourhood Profiles. Secondary Neighbourhood Profiles* 2015.
- 12 [http://www1.toronto.ca/wps/portal/contentonly?vgnextoid=ae17962c8c3f0410VgnVCM10000](http://www1.toronto.ca/wps/portal/contentonly?vgnextoid=ae17962c8c3f0410VgnVCM10000071d60f89RCRD&vgnextchannel=1e68f40f9aae0410VgnVCM10000071d60f89RCRD)
- 13 [071d60f89RCRD&vgnextchannel=1e68f40f9aae0410VgnVCM10000071d60f89RCRD](http://www1.toronto.ca/wps/portal/contentonly?vgnextoid=ae17962c8c3f0410VgnVCM10000071d60f89RCRD&vgnextchannel=1e68f40f9aae0410VgnVCM10000071d60f89RCRD).
- 14 40. Social Development Finance & Administration. *Wellbeing Toronto - Civics & Equity Indicators.*
- 15 *Secondary Wellbeing Toronto - Civics & Equity Indicators* December 17, 2014. 2014.
- 16 [http://www1.toronto.ca/wps/portal/contentonly?vgnextoid=906580ece073b410VgnVCM10000](http://www1.toronto.ca/wps/portal/contentonly?vgnextoid=906580ece073b410VgnVCM10000071d60f89RCRD&vgnextchannel=75d6e03bb8d1e310VgnVCM10000071d60f89RCRD)
- 17 [071d60f89RCRD&vgnextchannel=75d6e03bb8d1e310VgnVCM10000071d60f89RCRD](http://www1.toronto.ca/wps/portal/contentonly?vgnextoid=906580ece073b410VgnVCM10000071d60f89RCRD&vgnextchannel=75d6e03bb8d1e310VgnVCM10000071d60f89RCRD).
- 18 41. Social Development Finance & Administration, City of Toronto. *Boundaries of City of Toronto*
- 19 *Neighbourhoods. Secondary Boundaries of City of Toronto Neighbourhoods* 2014.
- 20 [http://www1.toronto.ca/wps/portal/contentonly?vgnextoid=04b489fe9c18b210VgnVCM10000](http://www1.toronto.ca/wps/portal/contentonly?vgnextoid=04b489fe9c18b210VgnVCM1000003dd60f89RCRD&vgnextchannel=75d6e03bb8d1e310VgnVCM10000071d60f89RCRD)
- 21 [03dd60f89RCRD&vgnextchannel=75d6e03bb8d1e310VgnVCM10000071d60f89RCRD](http://www1.toronto.ca/wps/portal/contentonly?vgnextoid=04b489fe9c18b210VgnVCM1000003dd60f89RCRD&vgnextchannel=75d6e03bb8d1e310VgnVCM10000071d60f89RCRD).
- 22 42. Statistics Canada. *Postal Code Conversion File (PCCF) Reference Guide: June 2013 postal codes.*
- 23 *Catalogue no. 92-154-G: Statistics Canada, 2013.*
- 24 43. Statistics Canada. *Forward Sortation Area Boundary File, Reference Guide: Census year 2011.*
- 25 *Catalogue no. 92-179-G: Statistics Canada, 2011.*
- 26 44. Williamson T, Green ME, Birtwhistle R, et al. Validating the 8 CPCSSN Case Definitions for Chronic
- 27 *Disease Surveillance in a Primary Care Database of Electronic Health Records. Annals of Family*
- 28 *Medicine* 2014;**12**(4):367-72 doi: 10.1370/afm.1644[published Online First: Epub Date]].
- 29 45. Friesen D, Rajagopalan P, Strashin J. *Toronto Crime by Neighbourhood. Secondary Toronto Crime by*
- 30 *Neighbourhood* April 15, 2015 2011. <http://www.cbc.ca/toronto/features/crimemap/>.
- 31 46. Toronto Community Health Profiles Partnership. *DA & CT ON-Marg Data, 2006.*, 2006.
- 32 47. Toronto Community Health Profiles Partnership. *Ontario Marginalization Index (ON-Marg).*
- 33 *Secondary Ontario Marginalization Index (ON-Marg)* 2015.
- 34 <http://www.torontohealthprofiles.ca/onmarg.php>.
- 35 48. Ekoé J-M, Punthakee Z, Ransom T, et al. Screening for Type 1 and Type 2 Diabetes. *Canadian Journal*
- 36 *of Diabetes* 2013;**37**(Supplement):S12-S15
- 37 49. Matheson FI, Dunn J, Smith KLW, et al. *Ontario Marginalization Index User Guide Version 1.0.*
- 38 *Toronto: Centre for Research on Inner City Health, 2012.*
- 39 50. Manaugh K, El-Geneidy A. Validating walkability indices: How do different households respond to the
- 40 *walkability of their neighborhood? Transportation research part D: transport and environment*
- 41 *2011;16*(4):309-15
- 42 51. Carr LJ, Dunsiger SI, Marcus BH. Walk score™ as a global estimate of neighborhood walkability.
- 43 *American Journal of Preventive Medicine* 2010;**39**(5):460-63
- 44 52. City of Toronto, City Planning Social Policy Analysis & Research. *2011 Census: Age and Sex Counts.*
- 45 *Toronto: City of Toronto, 2012.*
- 46 53. City of Toronto. *Toronto Health Indicators - A Comparative Look. Secondary Toronto Health*
- 47 *Indicators - A Comparative Look* 2014.
- 48 [http://www1.toronto.ca/wps/portal/contentonly?vgnextoid=d69e6032bcaa6410VgnVCM10000](http://www1.toronto.ca/wps/portal/contentonly?vgnextoid=d69e6032bcaa6410VgnVCM10000071d60f89RCRD)
- 49 [071d60f89RCRD](http://www1.toronto.ca/wps/portal/contentonly?vgnextoid=d69e6032bcaa6410VgnVCM10000071d60f89RCRD).
- 50 54. Toronto Community Health Profiles Partnership. *Age-Standardized Hypertension Prevalence Rate (%)*
- 51 *Among Adults 20+, 2012. Secondary Age-Standardized Hypertension Prevalence Rate (%) Among*
- 52
- 53
- 54
- 55
- 56
- 57
- 58
- 59
- 60

Adults 20+, 2012.

[http://www.torontohealthprofiles.ca/a\\_documents/TM\\_allCateg\\_maps/TM\\_maps\\_AHD/3\\_AHD\\_HBP\\_All\\_MF\\_N\\_2012\\_20plus\\_NB.pdf](http://www.torontohealthprofiles.ca/a_documents/TM_allCateg_maps/TM_maps_AHD/3_AHD_HBP_All_MF_N_2012_20plus_NB.pdf).

55. Connor Gorber S, Tremblay M, Moher D, et al. A comparison of direct vs. self-report measures for assessing height, weight and body mass index: a systematic review. *Obesity reviews : an official journal of the International Association for the Study of Obesity* 2007;**8**(4):307-26 doi: 10.1111/j.1467-789X.2007.00347.x[published Online First: Epub Date]].
56. Statistics Canada. Canadian Health Measures Survey: Household and physical measures data, 2012 to 2013. The Daily: Statistics Canada, 2013.
57. Hirsch JA, Diez Roux AV, Moore KA, et al. Change in walking and body mass index following residential relocation: the multi-ethnic study of atherosclerosis. *American Journal of Public Health* 2014;**104**(3):e49-e56
58. Sallis JF, Saelens BE, Frank LD, et al. Neighborhood built environment and income: examining multiple health outcomes. *Social Science & Medicine* 2009;**68**(7):1285-93
59. McCormack GR, Shiell A. In search of causality: a systematic review of the relationship between the built environment and physical activity among adults. *Int J Behav Nutr Phys Act* 2011;**8**(125):10.1186
60. Li F, Harmer P, Cardinal BJ, et al. Built environment and changes in blood pressure in middle aged and older adults. *Preventive medicine* 2009;**48**(3):237-41
61. Mayne SL, Auchincloss AH, Michael YL. Impact of policy and built environment changes on obesity-related outcomes: a systematic review of naturally occurring experiments. *Obesity reviews : an official journal of the International Association for the Study of Obesity* 2015;**16**(5):362-75 doi: 10.1111/obr.12269[published Online First: Epub Date]].
62. Berke EM, Koepsell TD, Moudon AV, et al. Association of the built environment with physical activity and obesity in older persons. *American Journal of Public Health* 2007;**97**(3):486-92
63. Whelton SP, Chin A, Xin X, et al. Effect of aerobic exercise on blood pressure: a meta-analysis of randomized, controlled trials. *Annals of internal medicine* 2002;**136**(7):493-503
64. Robitaille C, Dai S, Waters C, et al. Diagnosed hypertension in Canada: incidence, prevalence and associated mortality. *Canadian Medical Association Journal* 2012;**184**(1):E49-E56 doi: 10.1503/cmaj.101863[published Online First: Epub Date]].
65. Umpierre D, Ribeiro PA, Kramer CK, et al. Physical activity advice only or structured exercise training and association with HbA1c levels in type 2 diabetes: a systematic review and meta-analysis. *JAMA* 2011;**305**(17):1790-99
66. Shaw K, Gennat H, O'Rourke P, et al. Exercise for overweight or obesity. *The Cochrane database of systematic reviews* 2006(4):CD003817 doi: 10.1002/14651858.CD003817.pub3[published Online First: Epub Date]].
67. Leon AS, Sanchez OA. Response of blood lipids to exercise training alone or combined with dietary intervention. *Medicine and science in sports and exercise* 2001;**33**(6; SUPP):S502-S15
68. Third Report of the National Cholesterol Education Program (NCEP) Expert Panel on Detection, Evaluation, and Treatment of High Blood Cholesterol in Adults (Adult Treatment Panel III) final report. *Circulation* 2002;**106**(25):3143-421
69. Lee IM, Shiroma EJ, Lobelo F, et al. Impact of Physical Inactivity on the World's Major Non-Communicable Diseases. *Lancet (London, England)* 2012;**380**(9838):219-29 doi: 10.1016/S0140-6736(12)61031-9[published Online First: Epub Date]].
70. Rose G. Sick individuals and sick populations. *International journal of epidemiology* 2001;**30**(3):427-32

1  
2  
3  
4  
5  
6  
7  
8  
9  
10  
11  
12  
13  
14  
15  
16  
17  
18  
19  
20  
21  
22  
23  
24  
25  
26  
27  
28  
29  
30  
31  
32  
33  
34  
35  
36  
37  
38  
39  
40  
41  
42  
43  
44  
45  
46  
47  
48  
49  
50  
51  
52  
53  
54  
55  
56  
57  
58  
59  
60

For peer review only

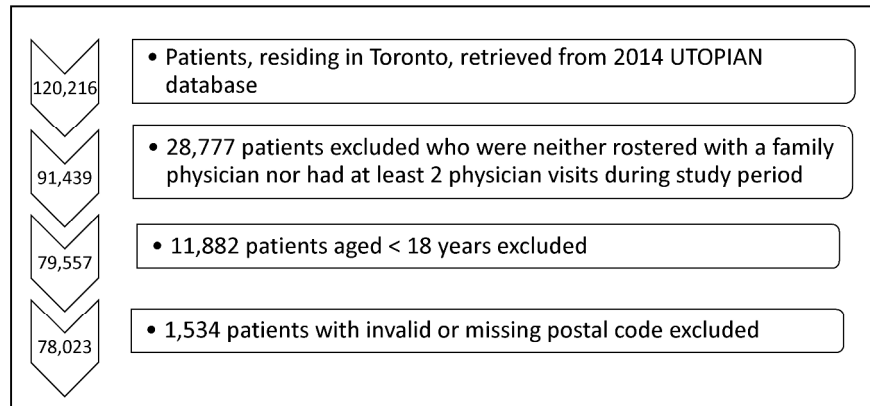

Figure 1. Sequence of steps in generation of study sample.

Figure 1

338x190mm (300 x 300 DPI)

review only

1  
2  
3  
4  
5  
6  
7  
8  
9  
10  
11  
12  
13  
14  
15  
16  
17  
18  
19  
20  
21  
22  
23  
24  
25  
26  
27  
28  
29  
30  
31  
32  
33  
34  
35  
36  
37  
38  
39  
40  
41  
42  
43  
44  
45  
46  
47  
48  
49  
50  
51  
52  
53  
54  
55  
56  
57  
58  
59  
60

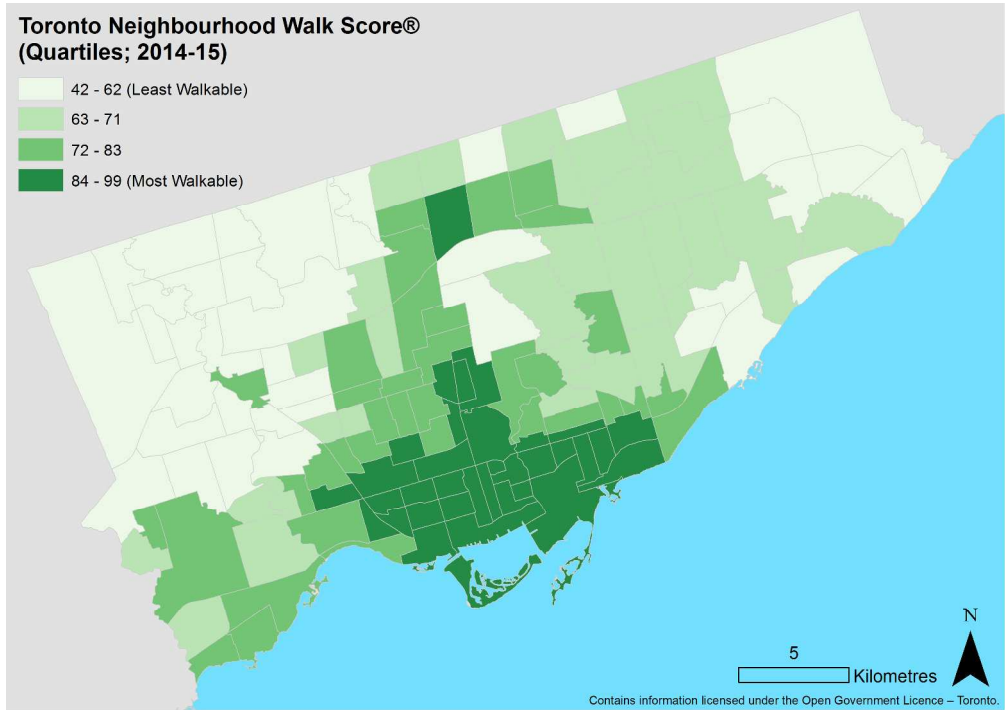

Figure 2. Map of Toronto neighbourhood walkability as measured by neighbourhood Walk Scores®. Walk Scores® for Toronto neighbourhoods (n=140) were retrieved from [www.walkscore.com](http://www.walkscore.com) [40].  
Figure 2  
297x209mm (300 x 300 DPI)

Review only

**Supplementary Table 1. Adjusted linear regression coefficients comparing differences in mean health measures between the highest three quartiles (Q2-Q4) of neighbourhood walkability and the lowest quartile (Q1).** Results are presented for all ages and for each age category. Regression coefficients represent differences in the mean health measure, adjusting for covariates of age, sex, BMI (except in the model where BMI is the health outcome measure) current smoking status, relevant medications and medical diagnoses, neighbourhood violent crime rates, and neighbourhood indices of material deprivation, ethnic concentration, dependency, and residential instability.

| Health measure [unit]                             | Q2-Q1 regression coefficient<br>(95% CI) | p-value | Q3-Q1 regression coefficient<br>(95% CI) | p-value | Q4-Q1 regression coefficient<br>(95% CI) | p-value |
|---------------------------------------------------|------------------------------------------|---------|------------------------------------------|---------|------------------------------------------|---------|
| <b>BMI [kg/m<sup>2</sup>] – all ages ≥ 18</b>     | -2.00 (-2.22 to -1.78)                   | <0.001  | -2.02 (-2.25 to -1.79)                   | <0.001  | -2.64 (-2.98 to -2.30)                   | <0.001  |
| 18 ≤ age < 40                                     | -3.54 (-4.00 to -3.08)                   | <0.001  | -3.51 (-3.99 to -3.03)                   | <0.001  | -4.44 (-5.09 to -3.79)                   | <0.001  |
| 40 ≤ age ≤ 65                                     | -1.83 (-2.16 to -1.50)                   | <0.001  | -1.92 (-2.27 to -1.57)                   | <0.001  | -2.74 (-3.24 to -2.23)                   | <0.001  |
| age > 65                                          | -0.79 (-1.14 to -0.43)                   | <0.001  | -0.91 (-1.30 to -0.52)                   | <0.001  | -0.87 (-1.48 to -0.26)                   | 0.005   |
| <b>sBP [mmHg] – all ages ≥ 18</b>                 | 0.14 (-0.29 to 0.56)                     | 0.52    | -0.95 (-1.40 to -0.50)                   | <0.001  | -1.35 (-2.01 to -0.70)                   | <0.001  |
| 18 ≤ age < 40                                     | 0.30 (-0.44 to 1.04)                     | 0.43    | -0.75 (-1.52 to 0.018)                   | 0.056   | -0.64 (-1.68 to 0.41)                    | 0.23    |
| 40 ≤ age ≤ 65                                     | 0.21 (-0.40 to 0.83)                     | 0.49    | -0.74 (-1.39 to -0.095)                  | 0.025   | -1.97 (-2.91 to -1.03)                   | <0.001  |
| age > 65                                          | 0.012 (-0.86 to 0.88)                    | 0.98    | -1.22 (-2.17 to -0.26)                   | 0.012   | -0.64 (-2.14 to 0.85)                    | 0.40    |
| <b>dBp [mmHg] – all ages ≥ 18</b>                 | -0.42 (-0.72 to -0.13)                   | 0.005   | -0.33 (-0.64 to -0.012)                  | 0.042   | -0.60 (-1.06 to -0.14)                   | 0.010   |
| 18 ≤ age < 40                                     | -0.47 (-1.04 to 0.10)                    | 0.11    | -0.29 (-0.89 to 0.30)                    | 0.33    | 0.12 (-0.68 to 0.93)                     | 0.76    |
| 40 ≤ age ≤ 65                                     | -0.26 (-0.68 to 0.16)                    | 0.23    | -0.31 (-0.75 to 0.13)                    | 0.16    | -1.30 (-1.94 to -0.66)                   | <0.001  |
| age > 65                                          | -0.69 (-1.24 to -0.14)                   | 0.014   | -0.57 (-1.18 to 0.030)                   | 0.063   | -0.19 (-1.13 to 0.75)                    | 0.69    |
| <b>HbA1c [%] – all ages ≥ 18</b>                  | -0.035 (-0.060 to -0.0093)               | 0.007   | -0.041 (-0.068 to -0.014)                | 0.003   | -0.063 (-0.11 to -0.021)                 | 0.003   |
| 18 ≤ age < 40                                     | -0.027 (-0.10 to 0.047)                  | 0.47    | -0.051 (-0.13 to 0.027)                  | 0.20    | -0.12 (-0.23 to -0.019)                  | 0.021   |
| 40 ≤ age ≤ 65                                     | -0.037 (-0.075 to 0.00049)               | 0.053   | -0.046 (-0.086 to -0.0055)               | 0.026   | -0.059 (-0.12 to 0.0026)                 | 0.060   |
| age > 65                                          | -0.018 (-0.054 to 0.018)                 | 0.34    | -0.015 (-0.055 to 0.018)                 | 0.46    | -0.013 (-0.078 to 0.051)                 | 0.69    |
| <b>FBG [mmol/L] – all ages ≥ 18</b>               | 0.0098 (-0.031 to 0.051)                 | 0.64    | 0.0041 (-0.041 to 0.049)                 | 0.86    | 0.030 (-0.038 to 0.099)                  | 0.39    |
| 18 ≤ age < 40                                     | -0.020 (-0.12 to 0.081)                  | 0.69    | -0.072 (-0.18 to 0.039)                  | 0.20    | -0.086 (-0.24 to 0.073)                  | 0.29    |
| 40 ≤ age ≤ 65                                     | 0.0060 (-0.052 to 0.064)                 | 0.84    | 0.00032 (-0.062 to 0.063)                | 0.99    | 0.028 (-0.068 to 0.12)                   | 0.57    |
| age > 65                                          | 0.018 (-0.050 to 0.085)                  | 0.60    | 0.032 (-0.043 to 0.11)                   | 0.40    | 0.083 (-0.036 to 0.20)                   | 0.17    |
| <b>total cholesterol [mmol/L] – all ages ≥ 18</b> | 0.038 (0.00077 to 0.074)                 | 0.045   | 0.020 (-0.019 to 0.060)                  | 0.31    | 0.061 (0.00025 to 0.12)                  | 0.049   |
| 18 ≤ age < 40                                     | -0.029 (-0.13 to 0.074)                  | 0.58    | -0.047 (-0.16 to 0.063)                  | 0.40    | -0.023 (-0.18 to 0.13)                   | 0.77    |
| 40 ≤ age ≤ 65                                     | 0.066 (0.016 to 0.12)                    | 0.010   | 0.041 (-0.013 to 0.095)                  | 0.13    | 0.11 (0.024 to 0.19)                     | 0.012   |
| age > 65                                          | 0.039 (-0.019 to 0.096)                  | 0.19    | -0.012 (-0.075 to 0.051)                 | 0.72    | -0.023 (-0.13 to 0.078)                  | 0.65    |
| <b>HDL [mmol/L] – all ages ≥ 18</b>               | 0.0046 (-0.0093 to 0.019)                | 0.52    | 0.0018 (-0.013 to 0.017)                 | 0.82    | 0.052 (0.029 to 0.075)                   | <0.001  |
| 18 ≤ age < 40                                     | -0.039 (-0.078 to 0.00044)               | 0.053   | -0.054 (-0.096 to -0.012)                | 0.012   | 0.022 (0.038 to 0.081)                   | 0.47    |
| 40 ≤ age ≤ 65                                     | -0.00062 (-0.020 to 0.019)               | 0.95    | 0.0014 (-0.019 to 0.022)                 | 0.90    | 0.052 (0.020 to 0.084)                   | 0.001   |
| age > 65                                          | 0.028 (0.0044 to 0.051)                  | 0.020   | 0.021 (-0.0043 to 0.047)                 | 0.10    | 0.060 (0.019 to 0.10)                    | 0.004   |
| <b>LDL [mmol/L] – all ages ≥ 18</b>               | 0.016 (-0.015 to 0.047)                  | 0.31    | 0.0084 (-0.025 to 0.042)                 | 0.62    | 0.010 (-0.041 to 0.062)                  | 0.69    |
| 18 ≤ age < 40                                     | -0.014 (-0.10 to 0.071)                  | 0.74    | 0.0014 (-0.090 to 0.093)                 | 0.98    | -0.0088 (-0.14 to 0.12)                  | 0.89    |
| 40 ≤ age ≤ 65                                     | 0.033 (-0.010 to 0.077)                  | 0.13    | 0.016 (-0.030 to 0.062)                  | 0.49    | 0.026 (-0.044 to 0.096)                  | 0.47    |
| age > 65                                          | 0.019 (-0.029 to 0.067)                  | 0.44    | -0.015 (-0.068 to 0.038)                 | 0.59    | -0.036 (-0.12 to 0.049)                  | 0.41    |
| <b>triglyceride [mmol/L] – all ages ≥ 18</b>      | 0.031 (0.00050 to 0.061)                 | 0.046   | 0.019 (-0.013 to 0.052)                  | 0.24    | -0.0031 (-0.053 to 0.047)                | 0.90    |
| 18 ≤ age < 40                                     | 0.0079 (-0.12 to 0.13)                   | 0.90    | -0.051 (-0.18 to 0.082)                  | 0.46    | -0.14 (-0.33 to 0.047)                   | 0.14    |
| 40 ≤ age ≤ 65                                     | 0.056 (0.014 to 0.097)                   | 0.009   | 0.035 (-0.010 to 0.079)                  | 0.13    | 0.038 (-0.029 to 0.11)                   | 0.27    |
| age > 65                                          | 0.00043 (-0.041 to 0.042)                | 0.98    | -0.0032 (-0.049 to 0.042)                | 0.89    | -0.041 (-0.11 to 0.033)                  | 0.28    |

## RESEARCH CHECKLIST

**STROBE Statement**—Checklist of items that should be included in reports of *cross-sectional studies*

|                              | Item No | Recommendation                                                                                                                                                                                                                                                                                                                                                                                                                                      |
|------------------------------|---------|-----------------------------------------------------------------------------------------------------------------------------------------------------------------------------------------------------------------------------------------------------------------------------------------------------------------------------------------------------------------------------------------------------------------------------------------------------|
| <b>Title and abstract</b>    | 1       | (a) Indicate the study's design with a commonly used term in the title or the abstract ✓ (p. 2)<br>(b) Provide in the abstract an informative and balanced summary of what was done and what was found ✓ (p.2)                                                                                                                                                                                                                                      |
| <b>Introduction</b>          |         |                                                                                                                                                                                                                                                                                                                                                                                                                                                     |
| Background/rationale         | 2       | Explain the scientific background and rationale for the investigation being reported ✓ (p. 4)                                                                                                                                                                                                                                                                                                                                                       |
| Objectives                   | 3       | State specific objectives, including any prespecified hypotheses ✓ (p. 4)                                                                                                                                                                                                                                                                                                                                                                           |
| <b>Methods</b>               |         |                                                                                                                                                                                                                                                                                                                                                                                                                                                     |
| Study design                 | 4       | Present key elements of study design early in the paper ✓ (p. 4)                                                                                                                                                                                                                                                                                                                                                                                    |
| Setting                      | 5       | Describe the setting, locations, and relevant dates, including periods of recruitment, exposure, follow-up, and data collection ✓ (p.4-5)                                                                                                                                                                                                                                                                                                           |
| Participants                 | 6       | (a) Give the eligibility criteria, and the sources and methods of selection of participants ✓ (p. 4-5)                                                                                                                                                                                                                                                                                                                                              |
| Variables                    | 7       | Clearly define all outcomes, exposures, predictors, potential confounders, and effect modifiers. Give diagnostic criteria, if applicable ✓ (p.4-6)                                                                                                                                                                                                                                                                                                  |
| Data sources/<br>measurement | 8*      | For each variable of interest, give sources of data and details of methods of assessment (measurement). Describe comparability of assessment methods if there is more than one group ✓ (p. 4-5)                                                                                                                                                                                                                                                     |
| Bias                         | 9       | Describe any efforts to address potential sources of bias ✓ (p. 4-6)                                                                                                                                                                                                                                                                                                                                                                                |
| Study size                   | 10      | Explain how the study size was arrived at ✓ (p.6)                                                                                                                                                                                                                                                                                                                                                                                                   |
| Quantitative variables       | 11      | Explain how quantitative variables were handled in the analyses. If applicable, describe which groupings were chosen and why ✓ (p. 5-6)                                                                                                                                                                                                                                                                                                             |
| Statistical methods          | 12      | (a) Describe all statistical methods, including those used to control for confounding ✓ (p. 5-6)<br>(b) Describe any methods used to examine subgroups and interactions ✓ (p. 6)<br>(c) Explain how missing data were addressed – data from EMR; N indicated for each variable of interest ✓ (p. 4-6, 8)<br>(d) If applicable, describe analytical methods taking account of sampling strategy – N/A<br>(e) Describe any sensitivity analyses – N/A |
| <b>Results</b>               |         |                                                                                                                                                                                                                                                                                                                                                                                                                                                     |
| Participants                 | 13*     | (a) Report numbers of individuals at each stage of study—eg numbers potentially eligible, examined for eligibility, confirmed eligible, included in the study, completing follow-up, and analysed ✓ (p. 6)<br>(b) Give reasons for non-participation at each stage ✓ (p. 6)<br>(c) Consider use of a flow diagram ✓ (p. 6)                                                                                                                          |
| Descriptive data             | 14*     | (a) Give characteristics of study participants (eg demographic, clinical, social) and information on exposures and potential confounders ✓ (p. 7-8)<br>(b) Indicate number of participants with missing data for each variable of interest – data from EMR; N indicated for each variable of interest ✓ (p. 8)                                                                                                                                      |
| Outcome data                 | 15*     | Report numbers of outcome events or summary measures ✓ (p. 8)                                                                                                                                                                                                                                                                                                                                                                                       |



|    |                          |    |                                                                                                                                                                                                                           |
|----|--------------------------|----|---------------------------------------------------------------------------------------------------------------------------------------------------------------------------------------------------------------------------|
| 1  |                          |    |                                                                                                                                                                                                                           |
| 2  |                          |    |                                                                                                                                                                                                                           |
| 3  | Main results             | 16 | (a) Give unadjusted estimates and, if applicable, confounder-adjusted estimates and their precision (eg, 95% confidence interval). Make clear which confounders were adjusted for and why they were included ✓ (p. 10-11) |
| 4  |                          |    |                                                                                                                                                                                                                           |
| 5  |                          |    | (b) Report category boundaries when continuous variables were categorized ✓ (p. 8-11)                                                                                                                                     |
| 6  |                          |    |                                                                                                                                                                                                                           |
| 7  |                          |    | (c) If relevant, consider translating estimates of relative risk into absolute risk for a meaningful time period – N/A                                                                                                    |
| 8  |                          |    |                                                                                                                                                                                                                           |
| 9  | Other analyses           | 17 | Report other analyses done—eg analyses of subgroups and interactions, and sensitivity analyses ✓ (p. 6, 11)                                                                                                               |
| 10 |                          |    |                                                                                                                                                                                                                           |
| 11 |                          |    |                                                                                                                                                                                                                           |
| 12 |                          |    |                                                                                                                                                                                                                           |
| 13 |                          |    |                                                                                                                                                                                                                           |
| 14 | <b>Discussion</b>        |    |                                                                                                                                                                                                                           |
| 15 | Key results              | 18 | Summarise key results with reference to study objectives ✓ (p. 11)                                                                                                                                                        |
| 16 | Limitations              | 19 | Discuss limitations of the study, taking into account sources of potential bias or imprecision. Discuss both direction and magnitude of any potential bias ✓ (p. 12)                                                      |
| 17 |                          |    |                                                                                                                                                                                                                           |
| 18 |                          |    |                                                                                                                                                                                                                           |
| 19 | Interpretation           | 20 | Give a cautious overall interpretation of results considering objectives, limitations, multiplicity of analyses, results from similar studies, and other relevant evidence ✓ (p. 11-14)                                   |
| 20 |                          |    |                                                                                                                                                                                                                           |
| 21 |                          |    |                                                                                                                                                                                                                           |
| 22 | Generalisability         | 21 | Discuss the generalisability (external validity) of the study results ✓ (p. 12)                                                                                                                                           |
| 23 |                          |    |                                                                                                                                                                                                                           |
| 24 | <b>Other information</b> |    |                                                                                                                                                                                                                           |
| 25 | Funding                  | 22 | Give the source of funding and the role of the funders for the present study and, if applicable, for the original study on which the present article is based – N/A                                                       |
| 26 |                          |    |                                                                                                                                                                                                                           |
| 27 |                          |    |                                                                                                                                                                                                                           |
| 28 |                          |    |                                                                                                                                                                                                                           |

29

30 \*Give information separately for exposed and unexposed groups.

31

32

33 **Note:** An Explanation and Elaboration article discusses each checklist item and gives methodological background and published examples of transparent reporting. The STROBE checklist is best used in conjunction with this article (freely available on the Web sites of PLoS Medicine at <http://www.plosmedicine.org/>, Annals of Internal Medicine at <http://www.annals.org/>, and Epidemiology at <http://www.epidem.com/>). Information on the STROBE Initiative is available at [www.strobe-statement.org](http://www.strobe-statement.org).

34

35

36

37

38

39

40

41

42

43

44

45

46

47

48

49

50

51

52

53

54

55

56

57

58

59

60
