# Supplementary material for: Association between neighbourhood walkability and metabolic risk factors influenced by physical activity: a cross-sectional study of adults in Toronto, Canada
Source: PubMed Central journal article supplement — BMJ Open. 2017 Apr 8;7(4):e013889. doi: 10.1136/bmjopen-2016-013889 (PMC5775455; doi:10.1136/bmjopen-2016-013889), 2017-04-08
Supplement: bmjopen-2016-013889supp001.pdf [file bmjopen-2016-013889supp001.pdf]

**Supplementary Table 1. Adjusted linear regression coefficients comparing differences in mean health measures between the highest three quartiles (Q2-Q4) of neighbourhood walkability and the lowest quartile (Q1).** Results are presented for all ages and for each age category. Regression coefficients represent differences in the mean health measure, adjusting for covariates of age, sex, BMI (except in the model where BMI is the health outcome measure) current smoking status, relevant medications and medical diagnoses, neighbourhood violent crime rates, and neighbourhood indices of material deprivation, ethnic concentration, dependency, and residential instability.

| Health measure [unit]                             | Q2-Q1 regression coefficient<br>(95% CI) | p-value | Q3-Q1 regression coefficient<br>(95% CI) | p-value | Q4-Q1 regression coefficient<br>(95% CI) | p-value |
|---------------------------------------------------|------------------------------------------|---------|------------------------------------------|---------|------------------------------------------|---------|
| <b>BMI [kg/m<sup>2</sup>]</b> – all ages ≥ 18     | -2.00 (-2.22 to -1.78)                   | <0.001  | -2.02 (-2.25 to -1.79)                   | <0.001  | -2.64 (-2.98 to -2.30)                   | <0.001  |
| 18 ≤ age < 40                                     | -3.54 (-4.00 to -3.08)                   | <0.001  | -3.51 (-3.99 to -3.03)                   | <0.001  | -4.44 (-5.09 to -3.79)                   | <0.001  |
| 40 ≤ age ≤ 65                                     | -1.83 (-2.16 to -1.50)                   | <0.001  | -1.92 (-2.27 to -1.57)                   | <0.001  | -2.74 (-3.24 to -2.23)                   | <0.001  |
| age > 65                                          | -0.79 (-1.14 to -0.43)                   | <0.001  | -0.91 (-1.30 to -0.52)                   | <0.001  | -0.87 (-1.48 to -0.26)                   | 0.005   |
| <b>sBP [mmHg]</b> – all ages ≥ 18                 | 0.14 (-0.29 to 0.56)                     | 0.52    | -0.95 (-1.40 to -0.50)                   | <0.001  | -1.35 (-2.01 to -0.70)                   | <0.001  |
| 18 ≤ age < 40                                     | 0.30 (-0.44 to 1.04)                     | 0.43    | -0.75 (-1.52 to 0.018)                   | 0.056   | -0.64 (-1.68 to 0.41)                    | 0.23    |
| 40 ≤ age ≤ 65                                     | 0.21 (-0.40 to 0.83)                     | 0.49    | -0.74 (-1.39 to -0.095)                  | 0.025   | -1.97 (-2.91 to -1.03)                   | <0.001  |
| age > 65                                          | 0.012 (-0.86 to 0.88)                    | 0.98    | -1.22 (-2.17 to -0.26)                   | 0.012   | -0.64 (-2.14 to 0.85)                    | 0.40    |
| <b>dBp [mmHg]</b> – all ages ≥ 18                 | -0.42 (-0.72 to -0.13)                   | 0.005   | -0.33 (-0.64 to -0.012)                  | 0.042   | -0.60 (-1.06 to -0.14)                   | 0.010   |
| 18 ≤ age < 40                                     | -0.47 (-1.04 to 0.10)                    | 0.11    | -0.29 (-0.89 to 0.30)                    | 0.33    | 0.12 (-0.68 to 0.93)                     | 0.76    |
| 40 ≤ age ≤ 65                                     | -0.26 (-0.68 to 0.16)                    | 0.23    | -0.31 (-0.75 to 0.13)                    | 0.16    | -1.30 (-1.94 to -0.66)                   | <0.001  |
| age > 65                                          | -0.69 (-1.24 to -0.14)                   | 0.014   | -0.57 (-1.18 to 0.030)                   | 0.063   | -0.19 (-1.13 to 0.75)                    | 0.69    |
| <b>HbA1c [%]</b> – all ages ≥ 18                  | -0.035 (-0.060 to -0.0093)               | 0.007   | -0.041 (-0.068 to -0.014)                | 0.003   | -0.063 (-0.11 to -0.021)                 | 0.003   |
| 18 ≤ age < 40                                     | -0.027 (-0.10 to 0.047)                  | 0.47    | -0.051 (-0.13 to 0.027)                  | 0.20    | -0.12 (-0.23 to -0.019)                  | 0.021   |
| 40 ≤ age ≤ 65                                     | -0.037 (-0.075 to 0.00049)               | 0.053   | -0.046 (-0.086 to -0.0055)               | 0.026   | -0.059 (-0.12 to 0.0026)                 | 0.060   |
| age > 65                                          | -0.018 (-0.054 to 0.018)                 | 0.34    | -0.015 (-0.055 to 0.018)                 | 0.46    | -0.013 (-0.078 to 0.051)                 | 0.69    |
| <b>FBG [mmol/L]</b> – all ages ≥ 18               | 0.0098 (-0.031 to 0.051)                 | 0.64    | 0.0041 (-0.041 to 0.049)                 | 0.86    | 0.030 (-0.038 to 0.099)                  | 0.39    |
| 18 ≤ age < 40                                     | -0.020 (-0.12 to 0.081)                  | 0.69    | -0.072 (-0.18 to 0.039)                  | 0.20    | -0.086 (-0.24 to 0.073)                  | 0.29    |
| 40 ≤ age ≤ 65                                     | 0.0060 (-0.052 to 0.064)                 | 0.84    | 0.00032 (-0.062 to 0.063)                | 0.99    | 0.028 (-0.068 to 0.12)                   | 0.57    |
| age > 65                                          | 0.018 (-0.050 to 0.085)                  | 0.60    | 0.032 (-0.043 to 0.11)                   | 0.40    | 0.083 (-0.036 to 0.20)                   | 0.17    |
| <b>total cholesterol [mmol/L]</b> – all ages ≥ 18 | 0.038 (0.00077 to 0.074)                 | 0.045   | 0.020 (-0.019 to 0.060)                  | 0.31    | 0.061 (0.00025 to 0.12)                  | 0.049   |
| 18 ≤ age < 40                                     | -0.029 (-0.13 to 0.074)                  | 0.58    | -0.047 (-0.16 to 0.063)                  | 0.40    | -0.023 (-0.18 to 0.13)                   | 0.77    |
| 40 ≤ age ≤ 65                                     | 0.066 (0.016 to 0.12)                    | 0.010   | 0.041 (-0.013 to 0.095)                  | 0.13    | 0.11 (0.024 to 0.19)                     | 0.012   |
| age > 65                                          | 0.039 (-0.019 to 0.096)                  | 0.19    | -0.012 (-0.075 to 0.051)                 | 0.72    | -0.023 (-0.13 to 0.078)                  | 0.65    |
| <b>HDL [mmol/L]</b> – all ages ≥ 18               | 0.0046 (-0.0093 to 0.019)                | 0.52    | 0.0018 (-0.013 to 0.017)                 | 0.82    | 0.052 (0.029 to 0.075)                   | <0.001  |
| 18 ≤ age < 40                                     | -0.039 (-0.078 to 0.00044)               | 0.053   | -0.054 (-0.096 to -0.012)                | 0.012   | 0.022 (0.038 to 0.081)                   | 0.47    |
| 40 ≤ age ≤ 65                                     | -0.00062 (-0.020 to 0.019)               | 0.95    | 0.0014 (-0.019 to 0.022)                 | 0.90    | 0.052 (0.020 to 0.084)                   | 0.001   |
| age > 65                                          | 0.028 (0.0044 to 0.051)                  | 0.020   | 0.021 (-0.0043 to 0.047)                 | 0.10    | 0.060 (0.019 to 0.10)                    | 0.004   |
| <b>LDL [mmol/L]</b> – all ages ≥ 18               | 0.016 (-0.015 to 0.047)                  | 0.31    | 0.0084 (-0.025 to 0.042)                 | 0.62    | 0.010 (-0.041 to 0.062)                  | 0.69    |
| 18 ≤ age < 40                                     | -0.014 (-0.10 to 0.071)                  | 0.74    | 0.0014 (-0.090 to 0.093)                 | 0.98    | -0.0088 (-0.14 to 0.12)                  | 0.89    |
| 40 ≤ age ≤ 65                                     | 0.033 (-0.010 to 0.077)                  | 0.13    | 0.016 (-0.030 to 0.062)                  | 0.49    | 0.026 (-0.044 to 0.096)                  | 0.47    |
| age > 65                                          | 0.019 (-0.029 to 0.067)                  | 0.44    | -0.015 (-0.068 to 0.038)                 | 0.59    | -0.036 (-0.12 to 0.049)                  | 0.41    |
| <b>triglyceride [mmol/L]</b> – all ages ≥ 18      | 0.031 (0.00050 to 0.061)                 | 0.046   | 0.019 (-0.013 to 0.052)                  | 0.24    | -0.0031 (-0.053 to 0.047)                | 0.90    |
| 18 ≤ age < 40                                     | 0.0079 (-0.12 to 0.13)                   | 0.90    | -0.051 (-0.18 to 0.082)                  | 0.46    | -0.14 (-0.33 to 0.047)                   | 0.14    |
| 40 ≤ age ≤ 65                                     | 0.056 (0.014 to 0.097)                   | 0.009   | 0.035 (-0.010 to 0.079)                  | 0.13    | 0.038 (-0.029 to 0.11)                   | 0.27    |
| age > 65                                          | 0.00043 (-0.041 to 0.042)                | 0.98    | -0.0032 (-0.049 to 0.042)                | 0.89    | -0.041 (-0.11 to 0.033)                  | 0.28    |
